# Supplementary material for: Metal-free direct construction of sulfenylated pyrazoles via the NaOH promoted sulfenylation of pyrazolones with aryl thiols
Source: Royal Society of Chemistry journal article supplement (doi:10.1039/c6ra09739a), 2016-01-01

## Supplementary Information

### **Metal-free direct construction of sulfenylated pyrazoles via the NaOH promoted sulfenylation of pyrazolones with aryl thiols**

Xiaoxia Liu<sup>‡</sup>, Huanhuan Cui<sup>‡</sup>, Daoshan Yang, Shicui Dai, Tiantian Zhang, Jingyu Sun, Wei Wei\*,  
Hua Wang\*

*The Key Laboratory of Life-Organic Analysis and Key Laboratory of Pharmaceutical  
Intermediates and Analysis of Natural Medicine, School of Chemistry and Chemical Engineering,  
Qufu Normal University, Qufu 273165, Shandong, China.*

\*Phone: +86 537 4458317; Fax: +86 537 4458317. E-mail: weiweiqfnu@163.com;  
huawang\_qfnu@126.com, website: <http://wang.qfnu.edu.cn>.

<sup>‡</sup> Authors with equal contribution.

## Contents

|                                                                                                                                         |         |
|-----------------------------------------------------------------------------------------------------------------------------------------|---------|
| 1. General information .....                                                                                                            | S2      |
| 2. General procedure for NaOH promoted sulfenylation of pyrazolones with aryl<br>thiols for the synthesis o sulfenylated pyrazoles..... | S3      |
| 3. The reaction of thiophenol <b>2b</b> was conducted independently under the standard<br>conditions .....                              | S3      |
| 4. The reaction of pyrazolone <b>1a</b> and diphenyl sulfide <b>4b</b> was conducted under the<br>standard conditions .....             | S3-S4   |
| 5. Characterization data of products <b>3aa–3ha</b> .....                                                                               | S4-S11  |
| 6. References.....                                                                                                                      | S12     |
| 7. Copies of NMR spectra for compounds <b>3aa–3ha</b> .....                                                                             | S13-S33 |

## 1. General information

All commercially available reagent grade chemicals were purchased from Aldrich, Acros, Alfa Aesar and Beijing Ouhe Chemical Company and used as received without further purification unless otherwise stated. All solvents were dried according to standard procedures.  $^1\text{H}$  NMR and  $^{13}\text{C}$  NMR spectra were recorded in  $\text{CDCl}_3$  on a Bruker Avance III 500 spectrometer with TMS as internal standard (500 MHz  $^1\text{H}$ , 125 MHz  $^{13}\text{C}$ ) at room temperature, the chemical shifts ( $\delta$ ) were expressed in ppm and  $J$  values were given in Hz. The following abbreviations are used to indicate the multiplicity: s (singlet), d (doublet), t (triplet), q (quartet), m (multiplet). All first order splitting patterns were assigned on the basis of the appearance of the multiplet. Splitting patterns that could not be easily interpreted were designated as multiplet (m). Mass analyses and HRMS were obtained on a Finnigan-LCQDECA mass spectrometer and a Bruker Daltonics Bio-TOF-Q mass spectrometer by the ESI method, respectively. Column chromatography was performed on silica gel (200 - 300 mesh).

## 2. General procedure for NaOH promoted sulfenylation of pyrazolones with aryl thiols for the synthesis of sulfenylated pyrazoles

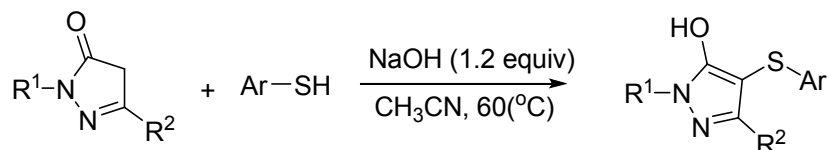

To a mixture of pyrazolone **1** (0.25 mmol, 43.6 mg), aryl thiol **2** (0.375 mmol, 46.6 mg), NaOH (0.3 mmol, 12.0 mg), and CH<sub>3</sub>CN (2 mL) in a 25 mL round-bottomed flask at room temperature under air. The reaction vessel was allowed to stir at 60 °C for 2-5h. After the reaction, the resulting mixture was concentrated under vacuum and the residue was purified by flash column chromatography using a mixture of petroleum ether and ethyl acetate as eluent to give the desired products.

## 3. The reaction of thiophenol **2b** was conducted independently under the standard conditions

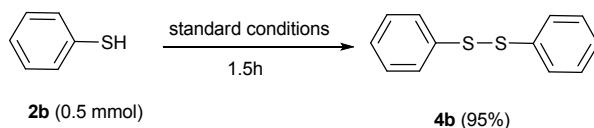

To a mixture of thiophenol **2b** (0.5 mmol, 51.1  $\mu$ l), NaOH (0.3 mmol, 12.0 mg), and CH<sub>3</sub>CN (2 mL) in a 25 mL round-bottomed flask at room temperature under air. The reaction vessel was allowed to stir at 60 °C for 1.5h. After the reaction, the resulting mixture was concentrated under vacuum and the residue was purified by flash column chromatography using a mixture of petroleum ether to give the desired product **4b** in 95% yield (52.1 mg, 0.238 mmol).

## 4. The reaction of pyrazolone **1a** and diphenyl sulfide **4b** was conducted under the standard conditions

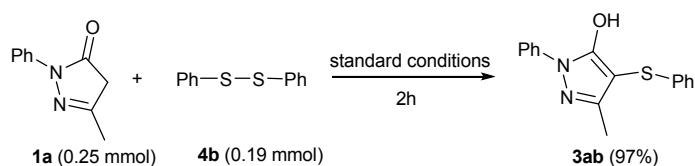

To a mixture of pyrazolone **1a** (0.25 mmol, 43.6 mg), diphenyl sulfide **4b** (0.19

mmol, 41.5 mg), NaOH (0.3 mmol, 12.0 mg), and CH<sub>3</sub>CN (2 mL) in a 25 mL round-bottomed flask at room temperature under air. The reaction vessel was allowed to stir at 60 °C for 2h. After the reaction, the resulting mixture was concentrated under vacuum and the residue was purified by flash column chromatography using a mixture of petroleum ether and ethyl acetate as eluent to give the desired product **3ab** in 97% yield (71.6mg, 0.243 mmol).

## 5. Characterization data of products 3aa-3ha

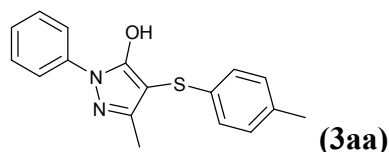

**3-methyl-1-phenyl-4-(p-tolylthio)-1H-pyrazol-5-ol**,<sup>[1]</sup> Compound **3aa** was obtained in 99% yield (73.3 mg, 0.248 mmol) according to the general procedure (2h). White solid, mp: 178.8-179.7 °C. <sup>1</sup>H NMR (d<sup>6</sup>DMSO, 500 MHz, ppm): δ 12.16 (s, 1H), 7.75 (d, *J* = 8.2 Hz, 2H), 7.48 (t, *J* = 7.8 Hz, 2H), 7.28 (t, *J* = 7.4 Hz, 1H), 7.10 (d, *J* = 8.2 Hz, 2H), 7.00 (d, *J* = 8.1 Hz, 2H), 2.24 (s, 3H), 2.12 (s, 3H); <sup>13</sup>C NMR (d<sup>6</sup>DMSO, 125 MHz, ppm): 157.5, 152.5, 138.7, 135.3, 134.8, 130.1, 129.4, 126.1, 125.8, 121.2, 88.6, 20.9, 12.8. HRMS (ESI) calcd for C<sub>17</sub>H<sub>17</sub>N<sub>2</sub>OS (M + H)<sup>+</sup> 297.1062, found 297.1067.

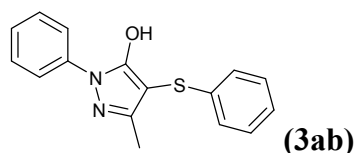

**3-methyl-1-phenyl-4-(phenylthio)-1H-pyrazol-5-ol**<sup>[2]</sup>, Compound **3ab** was obtained in 96% yield (67.9 mg, 0.241 mmol) according to the general procedure (3h). White solid, mp: 170.1-171.6 °C. <sup>1</sup>H NMR (d<sup>6</sup>DMSO, 500 MHz, ppm): δ 12.16 (s, 1H), 7.75 (d, *J* = 7.7 Hz, 2H), 7.48 (t, *J* = 7.6 Hz, 2H), 7.29 (t, *J* = 7.9 Hz, 3H), 7.13 (t, *J* = 7.4 Hz, 1H), 7.09 (d, *J* = 7.6 Hz, 2H), 2.13 (s, 3H); <sup>13</sup>C NMR (d<sup>6</sup>DMSO, 125 MHz, ppm): 157.5, 152.6, 138.9, 138.6, 129.5, 129.4, 126.2, 125.4, 125.4, 121.2, 87.9, 12.8. HRMS (ESI) calcd for C<sub>16</sub>H<sub>15</sub>N<sub>2</sub>OS (M + H)<sup>+</sup> 283.0905, found 283.0907.

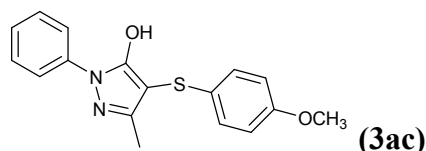

**4-(4-methoxyphenylthio)-3-methyl-1-phenyl-1H-pyrazol-5-ol**<sup>[2]</sup>, Compound **3ac** was obtained in 91% yield (70.7 mg, 0.227 mmol) according to the general procedure (4h). White solid, mp: 164.5-164.7 °C. <sup>1</sup>H NMR (d<sup>6</sup>DMSO, 500 MHz, ppm): δ 12.11 (s, 1H), 7.73 (d, *J* = 7.7 Hz, 2H), 7.49-7.45 (m, 2H), 7.27 (t, *J* = 7.4 Hz, 1H), 7.09 (t, *J* = 8.8 Hz, 2H), 6.90-6.87 (m, 2H), 3.71 (s, 3H), 2.14 (s, 3H); <sup>13</sup>C NMR (d<sup>6</sup>DMSO, 125 MHz, ppm): 158.0, 152.3, 138.7, 132.5, 129.4, 129.2, 128.2, 126.1, 121.1, 115.3, 89.7, 55.6, 12.8. HRMS (ESI) calcd for C<sub>17</sub>H<sub>17</sub>N<sub>2</sub>O<sub>2</sub>S (M + H)<sup>+</sup> 313.1011, found 313.1015.

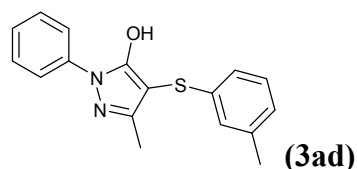

**3-methyl-1-phenyl-4-(m-tolylthio)-1H-pyrazol-5-ol**, Compound **3ad** was obtained in 85% yield (63.3 mg, 0.214 mmol) according to the general procedure (4h). White solid, mp: 179.6-181.0 °C. <sup>1</sup>H NMR (d<sup>6</sup>DMSO, 500 MHz, ppm): δ 12.16 (s, 1H), 7.76 (t, *J* = 1.1 Hz, 2H), 7.49-7.46 (m, 2H), 7.28 (t, *J* = 7.4 Hz, 1H), 7.17 (t, *J* = 7.6 Hz, 1H), 6.94 (d, *J* = 8.2 Hz, 2H), 6.85 (d, *J* = 8.0 Hz, 1H), 2.25 (s, 3H), 2.13 (s, 3H); <sup>13</sup>C NMR (d<sup>6</sup>DMSO, 125 MHz, ppm): 157.5, 152.5, 138.8, 138.7, 138.7, 129.4, 129.4, 126.3, 126.1, 125.8, 122.5, 121.1, 88.2, 21.5, 12.8. HRMS (ESI) calcd for C<sub>17</sub>H<sub>17</sub>N<sub>2</sub>OS (M + H)<sup>+</sup> 297.1062, found 297.1061.

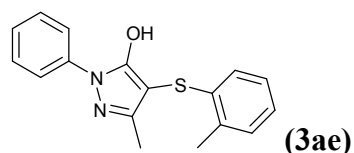

**3-methyl-1-phenyl-4-(o-tolylthio)-1H-pyrazol-5-ol**<sup>[1]</sup>, Compound **3ae** was obtained in 97% yield (71.8 mg, 0.242 mmol) according to the general procedure (2h). White solid, mp: 190.7-190.8 °C. <sup>1</sup>H NMR (d<sup>6</sup>DMSO, 500 MHz, ppm): δ 12.16 (s, 1H), 7.76 (d, *J* = 7.6 Hz, 2H), 7.48 (t, *J* = 7.6 Hz, 2H), 7.29 (t, *J* = 7.4 Hz, 1H), 7.18 (d, *J* = 7.3

Hz, 1H), 7.10 (t,  $J = 6.7$  Hz, 1H), 7.05-7.01 (m, 1H), 6.74 (d,  $J = 7.6$  Hz, 1H), 2.37 (s, 3H), 2.11 (s, 3H);  $^{13}\text{C}$  NMR ( $\text{d}_6\text{DMSO}$ , 125 MHz, ppm): 157.8, 152.7, 138.6, 137.7, 134.0, 130.5, 129.4, 127.0, 126.2, 125.0, 124.1, 121.2, 87.0, 19.7, 12.8. HRMS (ESI) calcd for  $\text{C}_{17}\text{H}_{17}\text{N}_2\text{OS}$  ( $\text{M} + \text{H}$ ) $^+$  297.1062, found 297.1063.

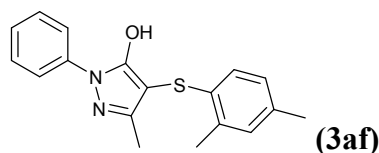

**4-(2,4-dimethylphenylthio)-3-methyl-1-phenyl-1H-pyrazol-5-ol**, Compound **3af** was obtained in 90% yield (69.8 mg, 0.225 mmol) according to the general procedure (4h). White solid, mp: 190.0-190.4 °C.  $^1\text{H}$  NMR ( $\text{d}_6\text{DMSO}$ , 500 MHz, ppm):  $\delta$  12.11 (s, 1H), 7.75 (d,  $J = 7.9$  Hz, 2H), 7.48 (t,  $J = 7.7$  Hz, 2H), 7.28 (t,  $J = 7.4$  Hz, 1H), 7.01 (s, 1H), 6.91 (d,  $J = 8.0$  Hz, 1H), 6.65 (d,  $J = 7.8$  Hz, 1H), 2.34 (s, 3H), 2.21 (s, 3H), 2.09 (s, 3H);  $^{13}\text{C}$  NMR ( $\text{d}_6\text{DMSO}$ , 125 MHz, ppm): 157.5, 152.6, 138.6, 134.3, 134.1, 134.1, 131.3, 129.4, 127.6, 126.1, 124.7, 121.1, 87.6, 20.7, 19.7, 12.7. HRMS (ESI) calcd for  $\text{C}_{18}\text{H}_{19}\text{N}_2\text{OS}$  ( $\text{M} + \text{H}$ ) $^+$  311.1218, found 311.1214.

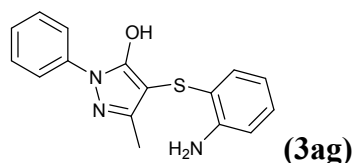

**4-(2-aminophenylthio)-3-methyl-1-phenyl-1H-pyrazol-5-ol**, Compound **3ag** was obtained in 97% yield (72.1 mg, 0.243 mmol) according to the general procedure (2h). Gray solid, mp: 182.9-183.1 °C.  $^1\text{H}$  NMR ( $\text{d}_6\text{DMSO}$ , 500 MHz, ppm):  $\delta$  7.71 (d,  $J = 8.0$  Hz, 2H), 7.46 (t,  $J = 7.8$  Hz, 2H), 7.26 (t,  $J = 7.4$  Hz, 1H), 7.14 (d,  $J = 6.7$  Hz, 1H), 6.99-6.96 (m, 1H), 6.68 (d,  $J = 7.8$  Hz, 1H), 6.50 (t,  $J = 7.4$  Hz, 1H), 3.85 (s, 2H), 2.20 (s, 3H);  $^{13}\text{C}$  NMR ( $\text{d}_6\text{DMSO}$ , 125 MHz, ppm): 159.2, 152.6, 148.4, 138.1, 132.7, 129.4, 128.9, 125.9, 120.6, 119.1, 117.1, 115.4, 92.3, 12.6. HRMS (ESI) calcd for  $\text{C}_{16}\text{H}_{16}\text{N}_3\text{OS}$  ( $\text{M} + \text{H}$ ) $^+$  298.1014, found 298.1013.

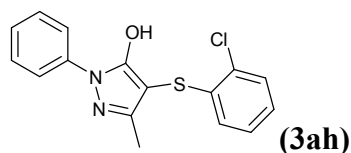

**4-(2-chlorophenylthio)-3-methyl-1-phenyl-1H-pyrazol-5-ol**, Compound **3ah** was obtained in 87% yield (68.6 mg, 0.217 mmol) according to the general procedure (2h). White solid, mp: 182.0-182.3 °C. <sup>1</sup>H NMR (d<sup>6</sup>DMSO, 500 MHz, ppm): δ 12.32 (s, 1H), 7.77 (t, *J* = 1.0 Hz, 2H), 7.49 (t, *J* = 7.6 Hz, 2H), 7.46-7.44 (m, 1H), 7.30 (t, *J* = 7.4 Hz, 1H), 7.28-7.24 (m, 1H), 7.17-7.14 (m, 1H), 6.78 (d, *J* = 7.7 Hz, 1H), 2.11 (s, 3H); <sup>13</sup>C NMR (d<sup>6</sup>DMSO, 125 MHz, ppm): 157.3, 152.6, 138.5, 137.7, 129.9, 129.4, 129.4, 128.2, 126.5, 126.3, 125.7, 121.4, 85.8, 12.7. HRMS (ESI) calcd for C<sub>16</sub>H<sub>14</sub>ClN<sub>2</sub>OS (M + H)<sup>+</sup> 317.0515, found 317.0517.

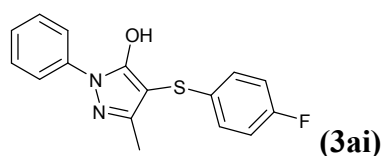

**4-(4-fluorophenylthio)-3-methyl-1-phenyl-1H-pyrazol-5-ol**<sup>[1]</sup>, Compound **3ai** was obtained in 98% yield (73.9 mg, 0.246 mmol) according to the general procedure (3h). White solid, mp: 170.8-171.1 °C. <sup>1</sup>H NMR (d<sup>6</sup>DMSO, 500 MHz, ppm): δ 12.26 (s, 1H), 7.74 (d, *J* = 7.7 Hz, 2H), 7.48 (t, *J* = 7.6 Hz, 2H), 7.28 (t, *J* = 7.4 Hz, 1H), 7.15 (t, *J* = 9.2 Hz, 4H), 2.14 (s, 3H); <sup>13</sup>C NMR (d<sup>6</sup>DMSO, 125 MHz, ppm): 160.9 (d, *J* = 240.4 Hz), 157.4, 152.4, 138.6, 134.3 (d, *J* = 2.8 Hz), 129.4, 127.7 (d, *J* = 7.9 Hz), 126.2, 121.2, 116.5 (d, *J* = 21.9 Hz), 88.5, 12.5. HRMS (ESI) calcd for C<sub>16</sub>H<sub>14</sub>FN<sub>2</sub>OS (M + H)<sup>+</sup> 301.0811, found 301.0815.

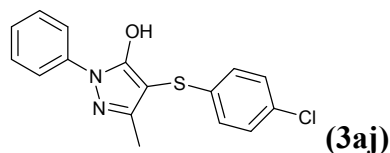

**4-(4-chlorophenylthio)-3-methyl-1-phenyl-1H-pyrazol-5-ol**<sup>[2]</sup>, Compound **3aj** was obtained in 91% yield (71.8 mg, 0.227 mmol) according to the general procedure (2h). White solid, mp: 179.1-181.1 °C. <sup>1</sup>H NMR (d<sup>6</sup>DMSO, 500 MHz, ppm): δ 12.26 (s,

1H), 7.75 (d,  $J = 8.0$  Hz, 2H), 7.48 (t,  $J = 7.8$  Hz, 2H), 7.35 (d,  $J = 8.6$  Hz, 2H), 7.29 (t,  $J = 7.4$  Hz, 1H), 7.10 (d,  $J = 8.6$  Hz, 2H), 2.13 (s, 3H);  $^{13}\text{C}$  NMR ( $\text{d}_6\text{DMSO}$ , 125 MHz, ppm): 157.2, 152.4, 138.5, 138.1, 130.0, 129.4, 129.4, 127.0, 126.2, 121.2, 87.3, 12.7. HRMS (ESI) calcd for  $\text{C}_{16}\text{H}_{14}\text{ClN}_2\text{OS}$  ( $\text{M} + \text{H}$ ) $^+$  317.0515, found 317.0513.

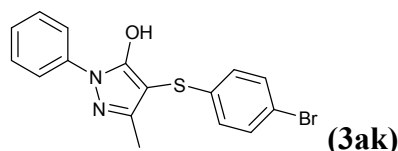

**4-(4-bromophenylthio)-3-methyl-1-phenyl-1H-pyrazol-5-ol**<sup>[2]</sup>, Compound **3ak** was obtained in 84% yield (76.2 mg, 0.212 mmol) according to the general procedure (3h). White solid, mp: 194.1-194.3 °C.  $^1\text{H}$  NMR ( $\text{d}_6\text{DMSO}$ , 500 MHz, ppm):  $\delta$  12.34 (s, 1H), 7.75 (d,  $J = 7.6$  Hz, 2H), 7.48 (t,  $J = 8.4$  Hz, 4H), 7.29 (t,  $J = 7.4$  Hz, 1H), 7.04 (d,  $J = 8.6$  Hz, 2H), 2.13 (s, 3H);  $^{13}\text{C}$  NMR ( $\text{d}_6\text{DMSO}$ , 125 MHz, ppm): 157.7, 152.4, 138.7, 138.6, 132.3, 129.4, 127.4, 126.2, 121.2, 118.1, 87.3, 12.8. HRMS (ESI) calcd for  $\text{C}_{16}\text{H}_{14}\text{BrN}_2\text{OS}$  ( $\text{M} + \text{H}$ ) $^+$  361.0010, found 361.0011.

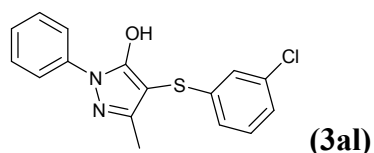

**4-(3-chlorophenylthio)-3-methyl-1-phenyl-1H-pyrazol-5-ol**<sup>[1]</sup>, Compound **3al** was obtained in 92% yield (72.9 mg, 0.231 mmol) according to the general procedure (2h). White solid, mp: 182.1-182.9 °C.  $^1\text{H}$  NMR ( $\text{d}_6\text{DMSO}$ , 500 MHz, ppm):  $\delta$  12.33 (s, 1H), 7.75 (d,  $J = 7.9$  Hz, 2H), 7.49 (t,  $J = 7.7$  Hz, 2H), 7.33-7.28 (m, 2H), 7.20-7.18 (m, 1H), 7.07-7.05 (m, 2H), 2.14 (s, 3H);  $^{13}\text{C}$  NMR ( $\text{d}_6\text{DMSO}$ , 125 MHz, ppm): 157.7, 152.4, 141.8, 138.5, 134.3, 131.2, 129.4, 126.3, 125.4, 124.5, 124.0, 121.3, 87.0, 12.7. HRMS (ESI) calcd for  $\text{C}_{16}\text{H}_{14}\text{ClN}_2\text{OS}$  ( $\text{M} + \text{H}$ ) $^+$  317.0515, found 317.0517.

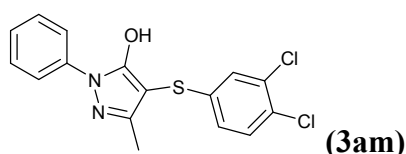

**4-(3,4-dichlorophenylthio)-3-methyl-1-phenyl-1H-pyrazol-5-ol**, Compound **3am**



was obtained in 89% yield (77.7 mg, 0.222 mmol) according to the general procedure (2h). White solid, mp: 89.2-90.3 °C. <sup>1</sup>H NMR (d<sup>6</sup>DMSO, 500 MHz, ppm): δ 7.75 (d, *J* = 7.6 Hz, 2H), 7.53 (d, *J* = 8.5 Hz, 1H), 7.48 (t, *J* = 7.6 Hz, 2H), 7.30-7.27 (m, 2H), 7.06-7.04 (m, 1H), 2.14 (s, 3H); <sup>13</sup>C NMR (d<sup>6</sup>DMSO, 125 MHz, ppm): 157.5, 152.4, 140.5, 138.4, 132.2, 131.4, 129.4, 127.8, 126.5, 126.3, 125.5, 121.2, 87.0, 12.7. HRMS (ESI) calcd for C<sub>16</sub>H<sub>13</sub>Cl<sub>2</sub>N<sub>2</sub>OS (M + H)<sup>+</sup> 351.0126, found 351.0121.

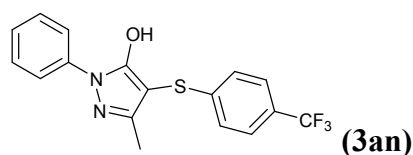

**3-methyl-1-phenyl-4-(4-(trifluoromethyl)phenylthio)-1H-pyrazol-5-ol**, Compound **3an** was obtained in 97% yield (84.8 mg, 0.242 mmol) according to the general procedure (4h). White solid, mp: 198.9-199.3 °C. <sup>1</sup>H NMR (d<sup>6</sup>DMSO, 500 MHz, ppm): δ 12.40 (s, 1H), 7.76 (d, *J* = 7.6 Hz, 2H), 7.63 (d, *J* = 8.4 Hz, 2H), 7.49 (t, *J* = 7.6 Hz, 2H), 7.30 (t, *J* = 7.4 Hz, 1H), 7.27 (d, *J* = 8.3 Hz, 2H), 2.14 (s, 3H); <sup>13</sup>C NMR (d<sup>6</sup>DMSO, 125 MHz, ppm): 157.5, 152.4, 145.0, 138.5, 129.4, 128.8 (d, *J* = 132.5 Hz), 126.2 (q, *J* = 3.8 Hz), 125.8 (d, *J* = 31.7 Hz), 125.4, 124.8 (d, *J* = 269.9 Hz), 121.3, 88.3, 12.7. HRMS (ESI) calcd for C<sub>17</sub>H<sub>14</sub>F<sub>3</sub>N<sub>2</sub>OS (M + H)<sup>+</sup> 351.0779, found 351.0781.

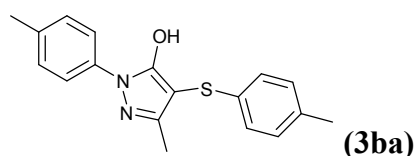

**3-methyl-1-p-tolyl-4-(p-tolylthio)-1H-pyrazol-5-ol**<sup>[2]</sup>, Compound **3ba** was obtained in 93% yield (72.2 mg, 0.233 mmol) according to the general procedure (4h). White solid, mp: 98.9-100.7 °C. <sup>1</sup>H NMR (d<sup>6</sup>DMSO, 500 MHz, ppm): δ 12.07 (s, 1H), 7.61 (d, *J* = 8.5 Hz, 2H), 7.27 (d, *J* = 8.4 Hz, 2H), 7.10 (d, *J* = 8.2 Hz, 2H), 6.99 (d, *J* = 8.2 Hz, 2H), 2.33 (s, 3H), 2.24 (s, 3H), 2.11 (s, 3H); <sup>13</sup>C NMR (d<sup>6</sup>DMSO, 125 MHz, ppm): 156.3, 152.0, 136.3, 135.4, 135.3, 134.7, 130.1, 129.8, 125.7, 121.2, 88.2, 21.0, 20.9, 12.8. HRMS (ESI) calcd for C<sub>18</sub>H<sub>19</sub>N<sub>2</sub>OS (M + H)<sup>+</sup> 311.1218, found 311.1215.

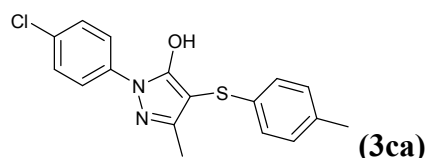

**1-(4-chlorophenyl)-3-methyl-4-(p-tolylthio)-1H-pyrazol-5-ol**, Compound **3ca** was obtained in 98% yield (81.2 mg, 0.246 mmol) according to the general procedure (2h). White solid, mp: 89.7-90.1 °C. <sup>1</sup>H NMR (d<sup>6</sup>DMSO, 500 MHz, ppm): δ 12.38 (s, 1H), 7.80-7.79 (m, 2H), 7.54-7.53 (m, 2H), 7.10 (d, *J* = 8.2 Hz, 2H), 6.99 (d, *J* = 8.2 Hz, 2H), 2.24 (s, 3H), 2.12 (s, 3H); <sup>13</sup>C NMR (d<sup>6</sup>DMSO, 125 MHz, ppm): 157.5, 152.9, 137.5, 135.1, 134.8, 130.1, 130.1, 129.4, 125.8, 122.4, 88.8, 20.9, 12.8. HRMS (ESI) calcd for C<sub>17</sub>H<sub>16</sub>ClN<sub>2</sub>OS (M + H)<sup>+</sup> 331.0672, found 331.0677.

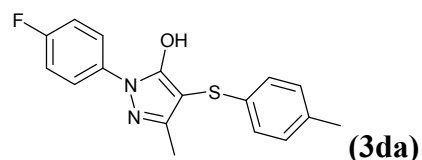

**1-(4-fluorophenyl)-3-methyl-4-(p-tolylthio)-1H-pyrazol-5-ol**, Compound **3da** was obtained in 81% yield (64.0 mg, 0.204 mmol) according to the general procedure (2h). White solid, mp: 151.8-152.4 °C. <sup>1</sup>H NMR (d<sup>6</sup>DMSO, 500 MHz, ppm): δ 12.21 (s, 1H), 7.78-7.75 (m, 2H), 7.32 (t, *J* = 8.9 Hz, 2H), 7.10 (d, *J* = 8.1 Hz, 2H), 6.99 (d, *J* = 8.2 Hz, 2H), 2.24 (s, 3H), 2.11 (s, 3H); <sup>13</sup>C NMR (d<sup>6</sup>DMSO, 125 MHz, ppm): 160.2 (d, *J* = 241.4 Hz), 156.9, 152.4, 135.2, 135.1, 134.8, 130.1, 125.8, 123.3 (d, *J* = 8.0 Hz), 116.1 (d, *J* = 22.6 Hz), 88.5, 20.9, 12.8. HRMS (ESI) calcd for C<sub>17</sub>H<sub>16</sub>FN<sub>2</sub>OS (M + H)<sup>+</sup> 315.0967, found 315.0969.

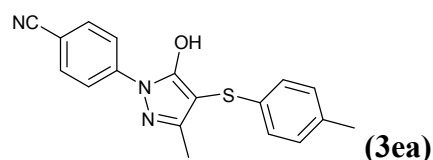

**4-(5-hydroxy-3-methyl-4-(p-tolylthio)-1H-pyrazol-1-yl)benzonitrile**<sup>[1]</sup>, Compound **3ea** was obtained in 77% yield (61.7 mg, 0.192 mmol) according to the general procedure (2h). White solid, mp: 184.2-184.6 °C. <sup>1</sup>H NMR (d<sup>6</sup>DMSO, 500 MHz, ppm): δ 12.67 (s, 1H), 8.02 (d, *J* = 8.9 Hz, 2H), 7.93 (d, *J* = 8.8 Hz, 2H), 7.10 (d, *J* = 8.2 Hz, 2H), 7.00 (d, *J* = 8.2 Hz, 2H), 2.23 (s, 3H), 2.14 (s, 3H); <sup>13</sup>C NMR (d<sup>6</sup>DMSO, 125

MHz, ppm): 158.7, 154.2, 142.0, 135.0, 134.8, 133.9, 130.2, 125.9, 120.2, 119.2, 107.6, 89.4, 20.9, 12.8. HRMS (ESI) calcd for  $C_{18}H_{16}N_3OS$  ( $M + H$ )<sup>+</sup> 322.1014, found 322.1016.

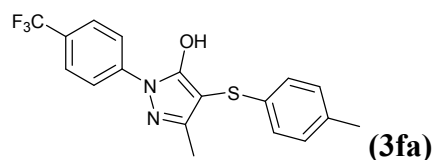

**3-methyl-4-(p-tolylthio)-1-(4-(trifluoromethyl)phenyl)-1H-pyrazol-5-ol,**

Compound **3fa** was obtained in 87% yield (79.2 mg, 0.218 mmol) according to the general procedure (2h). White solid, mp: 173.6-174.2 °C. <sup>1</sup>H NMR (d<sup>6</sup>DMSO, 500 MHz, ppm): δ 12.49 (s, 1H), 8.03 (d, *J* = 8.7 Hz, 2H), 7.85 (d, *J* = 8.8 Hz, 2H), 7.10 (d, *J* = 8.2 Hz, 2H), 7.01 (d, *J* = 8.2 Hz, 2H), 2.24 (s, 3H), 2.14 (s, 3H); <sup>13</sup>C NMR (d<sup>6</sup>DMSO, 125 MHz, ppm): 158.3, 153.9, 141.7, 134.9 (d, *J* = 16.0 Hz), 130.2, 127.9, 126.7 (q, *J* = 3.3 Hz), 125.9, 124.7 (d, *J* = 270.2 Hz), 121.4, 120.5, 89.3, 20.9, 12.8. HRMS (ESI) calcd for  $C_{18}H_{16}F_3N_2OS$  ( $M + H$ )<sup>+</sup> 365.0935, found 365.0933.

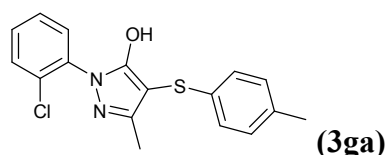

**1-(2-chlorophenyl)-3-methyl-4-(p-tolylthio)-1H-pyrazol-5-ol,** Compound **3ga** was obtained in 90% yield (74.6 mg, 0.226 mmol) according to the general procedure (5h). White solid, mp: 98.7-100.1 °C. <sup>1</sup>H NMR (d<sup>6</sup>DMSO, 500 MHz, ppm): δ 11.86 (s, 1H), 7.67-7.65 (m, 1H), 7.56-7.48 (m, 3H), 7.11 (d, *J* = 8.1 Hz, 2H), 7.00 (d, *J* = 8.0 Hz, 2H), 2.25 (s, 3H), 2.08 (s, 3H); <sup>13</sup>C NMR (d<sup>6</sup>DMSO, 125 MHz, ppm): 158.4, 152.4, 135.8, 135.6, 134.6, 131.9, 131.0, 130.6, 130.5, 130.1, 128.4, 125.5, 86.4, 20.9, 12.8. HRMS (ESI) calcd for  $C_{17}H_{16}ClN_2OS$  ( $M + H$ )<sup>+</sup> 331.0672, found 331.0677.

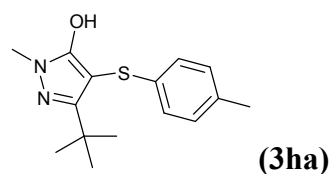

**3-tert-butyl-1-methyl-4-(p-tolylthio)-1H-pyrazol-5-ol,** Compound **3ha** was

obtained in 90% yield (62.3 mg, 0.226 mmol) according to the general procedure (4h). White solid, mp: 211.4-211.6 °C. <sup>1</sup>H NMR (d<sup>6</sup>DMSO, 500 MHz, ppm): δ 11.14 (s, 1H), 7.06 (d, *J* = 8.2 Hz, 2H), 6.86 (d, *J* = 8.2 Hz, 2H), 3.52 (s, 3H), 2.22 (s, 3H), 1.22 (s, 9H); <sup>13</sup>C NMR (d<sup>6</sup>DMSO, 125 MHz, ppm): 159.1, 157.2, 136.7, 134.0, 129.8, 124.9, 82.4, 33.9, 33.8, 29.6, 20.9. HRMS (ESI) calcd for C<sub>15</sub>H<sub>21</sub>N<sub>2</sub>OS (M + H)<sup>+</sup> 277.1375, found 277.1371.

## 6. Reference

- [1] X. Zhao, L. Zhang, T. Li, G. Liu, H. Wang and K. Lu, *Chem. Commun.*, 2014, **50**, 13121.
- [2] V. B. Purohit, S. C. Karad, K. H. Patel and D. K. Raval, *Tetrahedron*, 2016, **72**, 1114.

## 7. Copies of NMR spectra for compounds 3aa-3ha

3aa

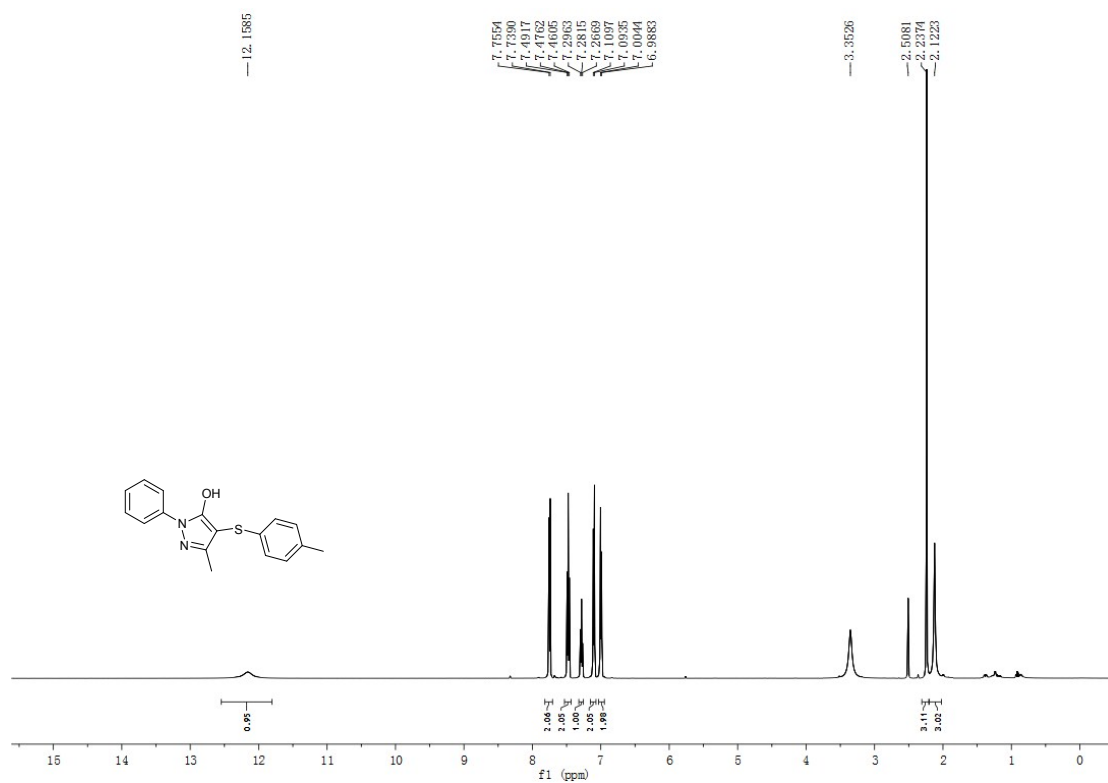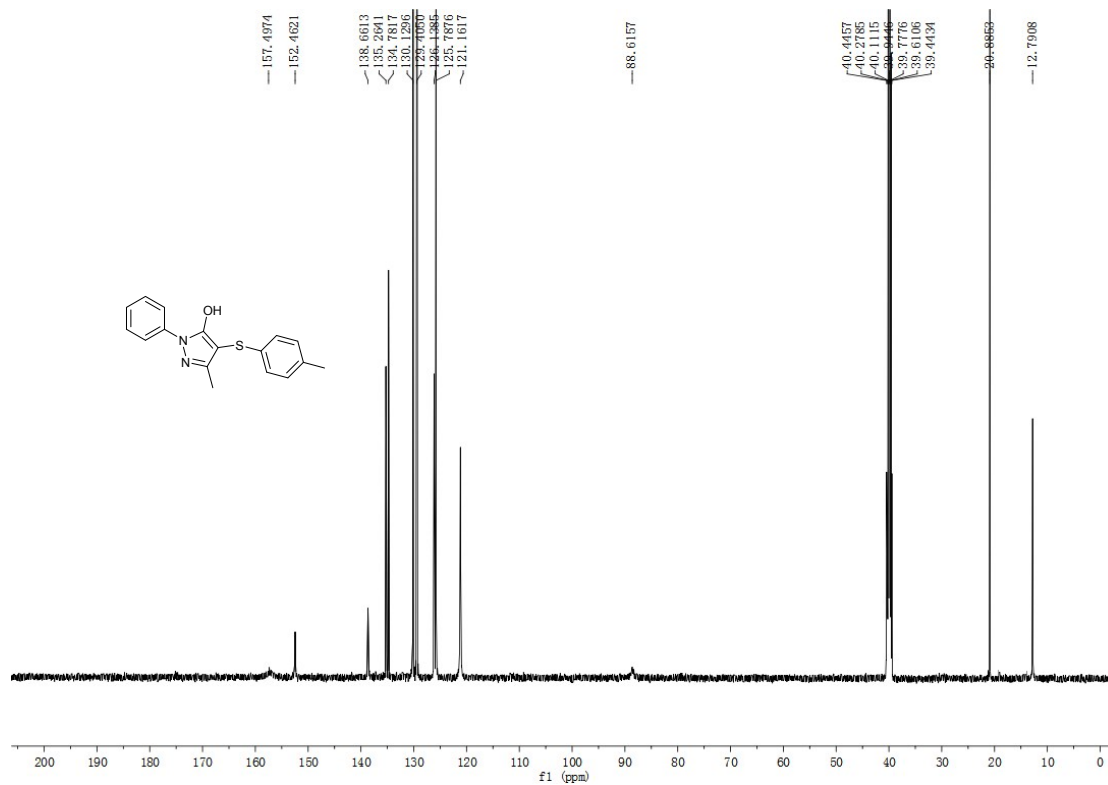

3ab

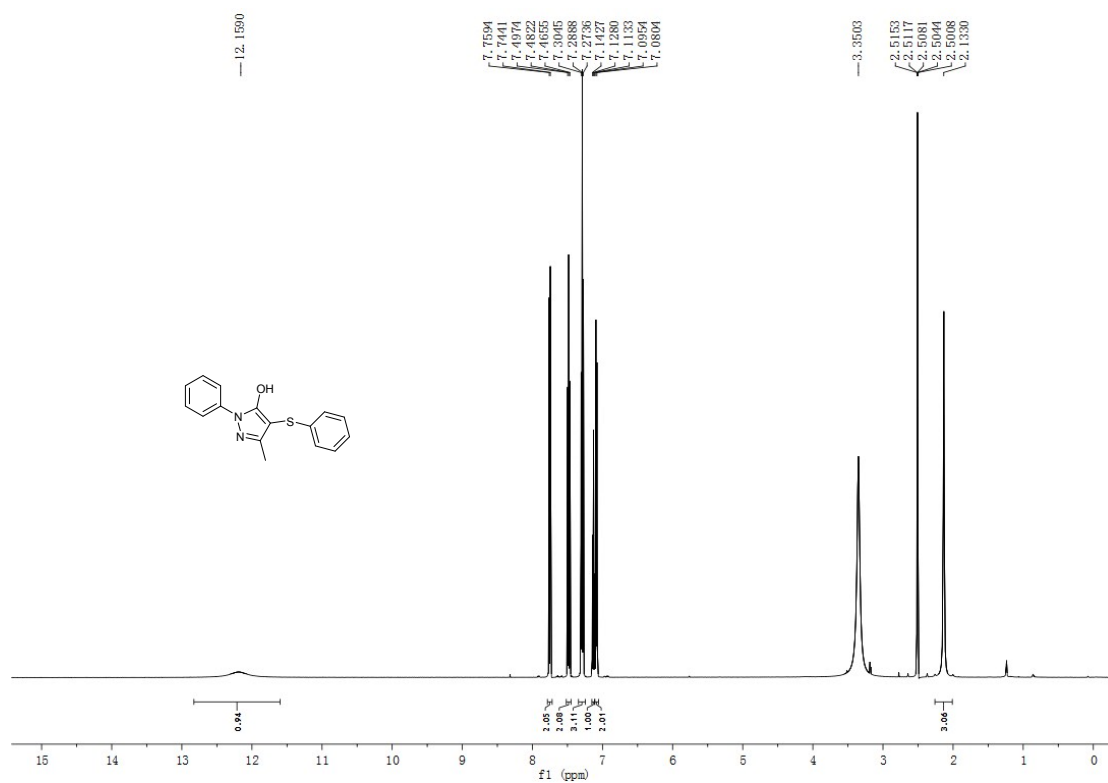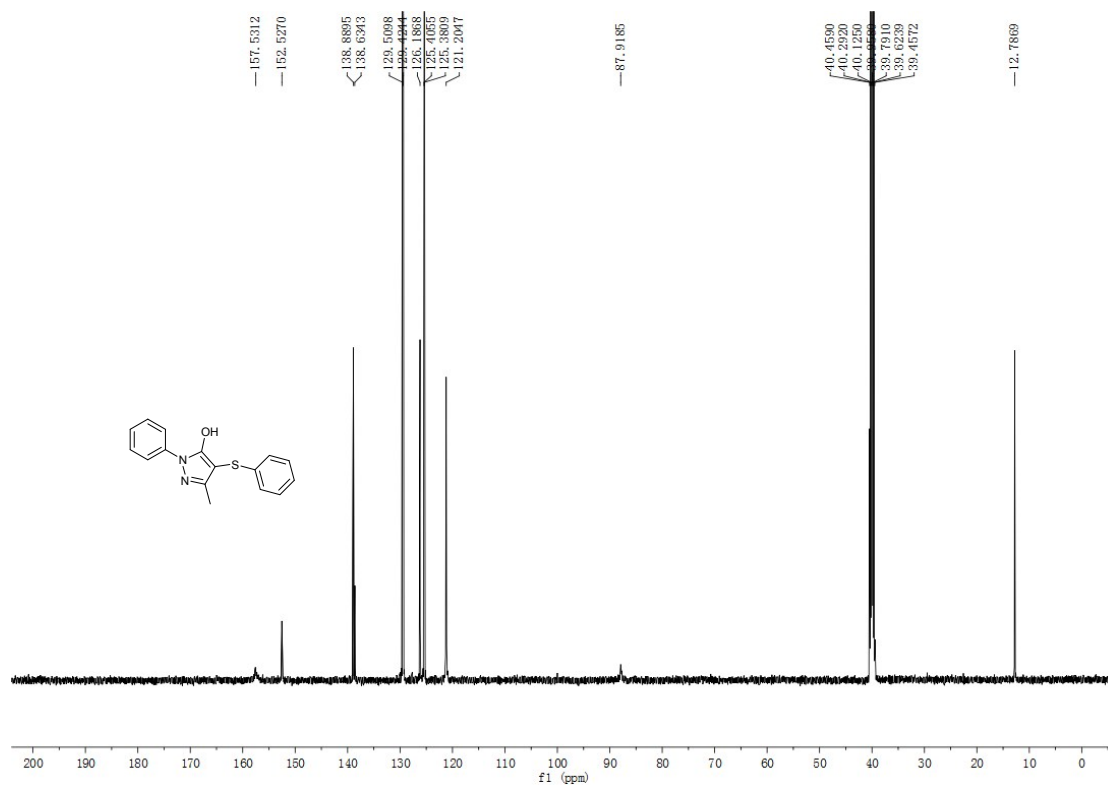

3ac

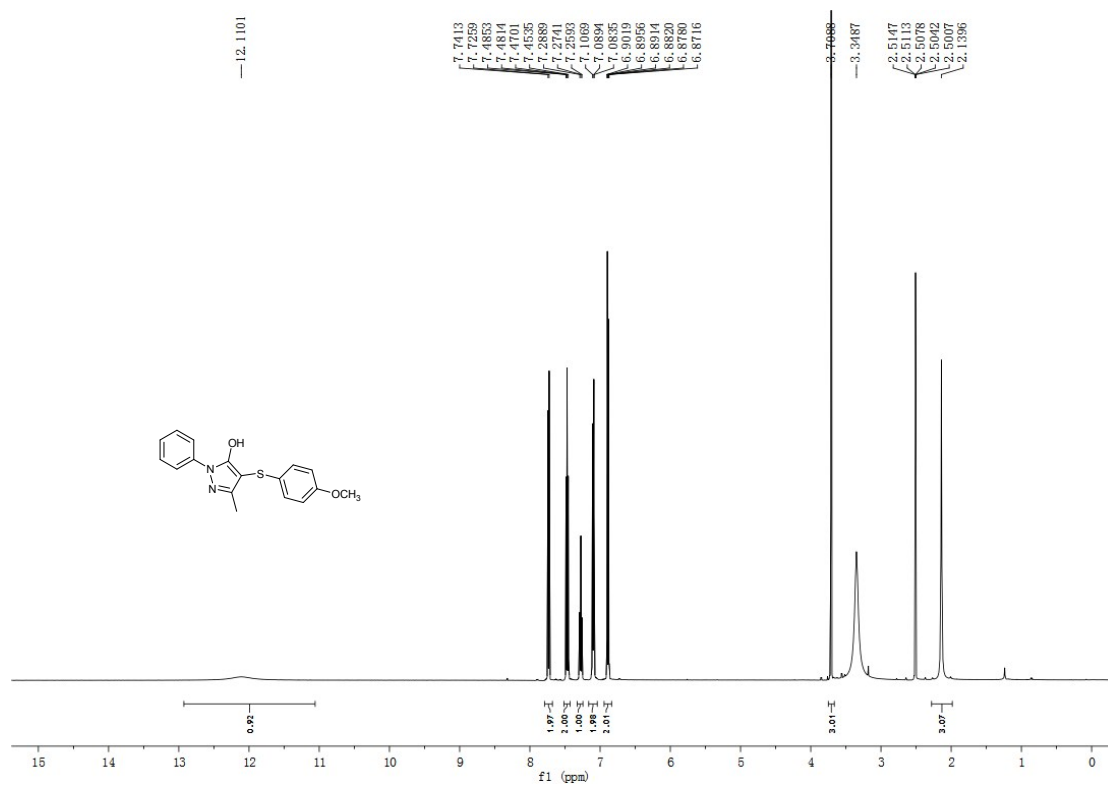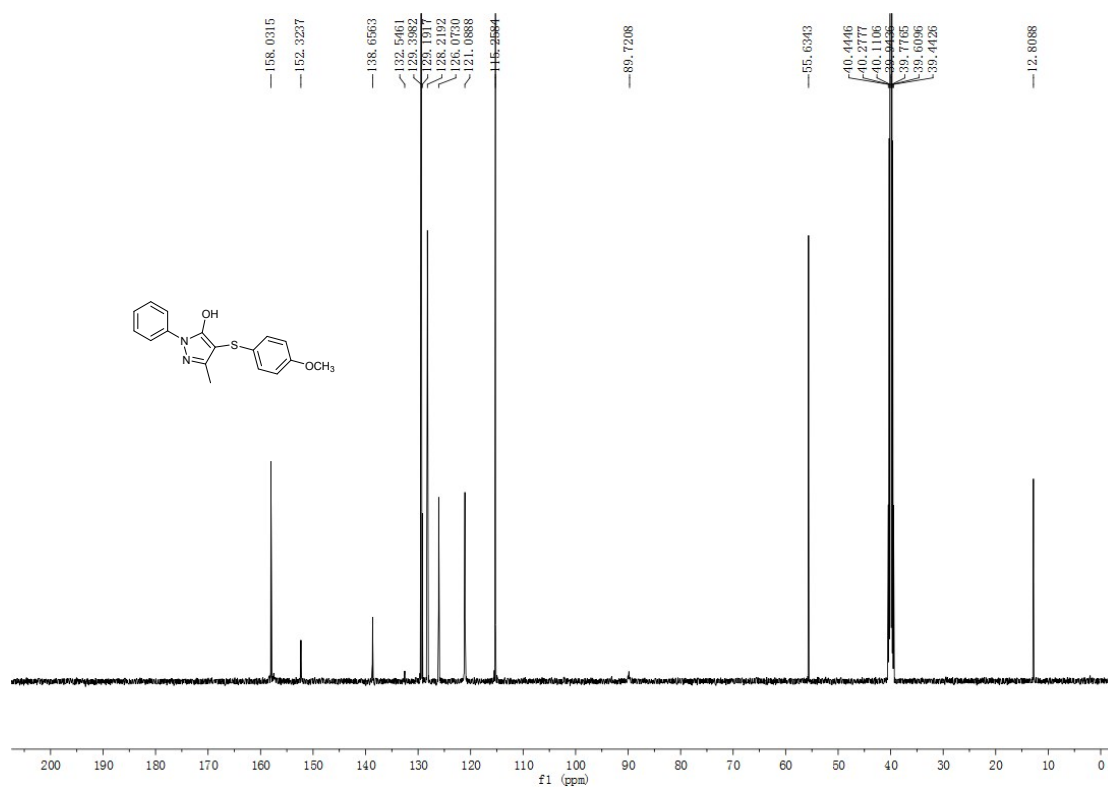

3ad

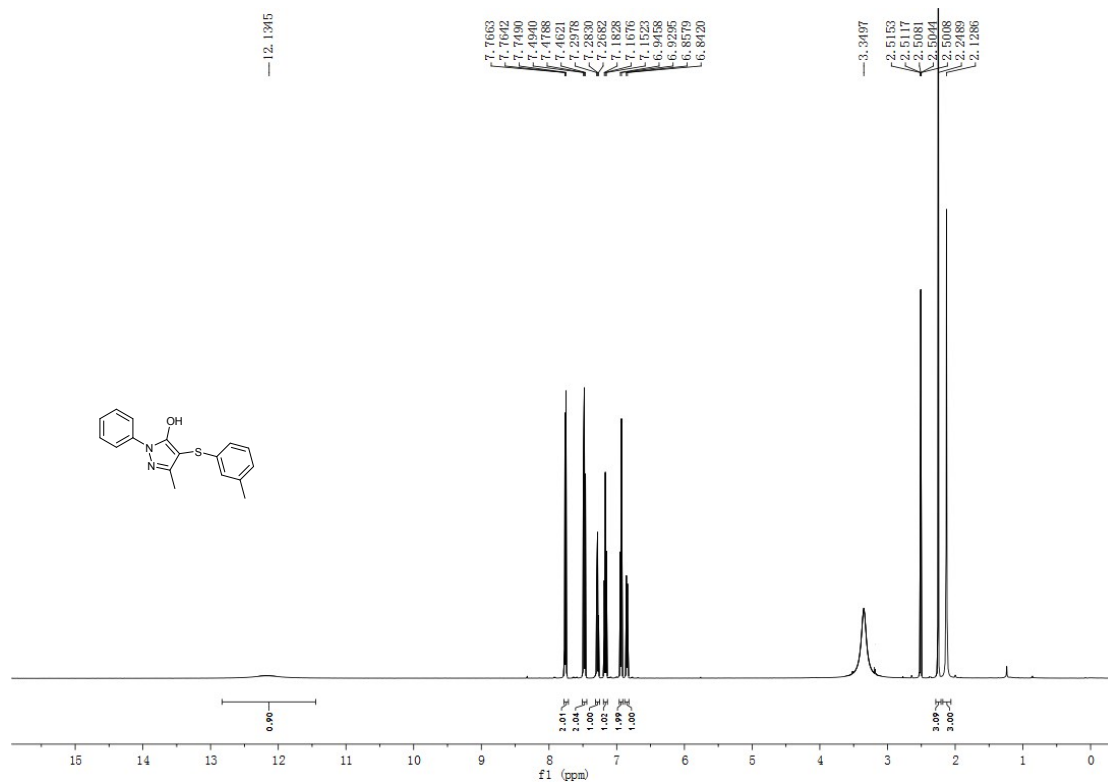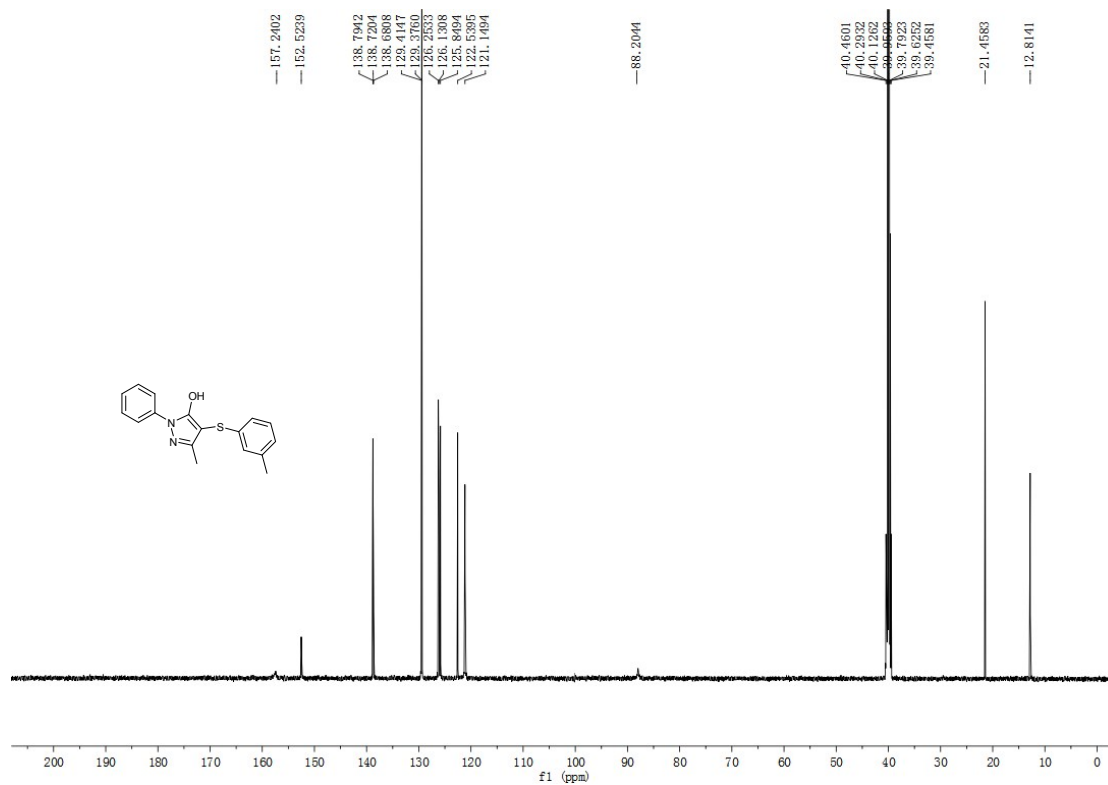



3ae

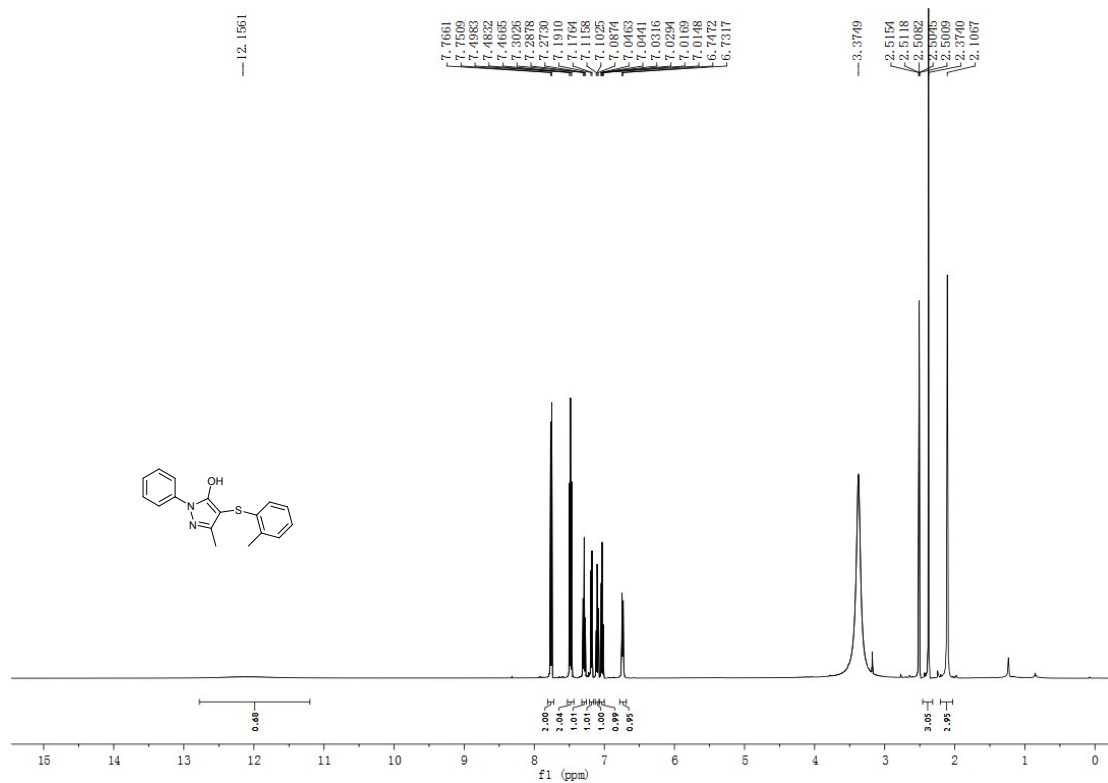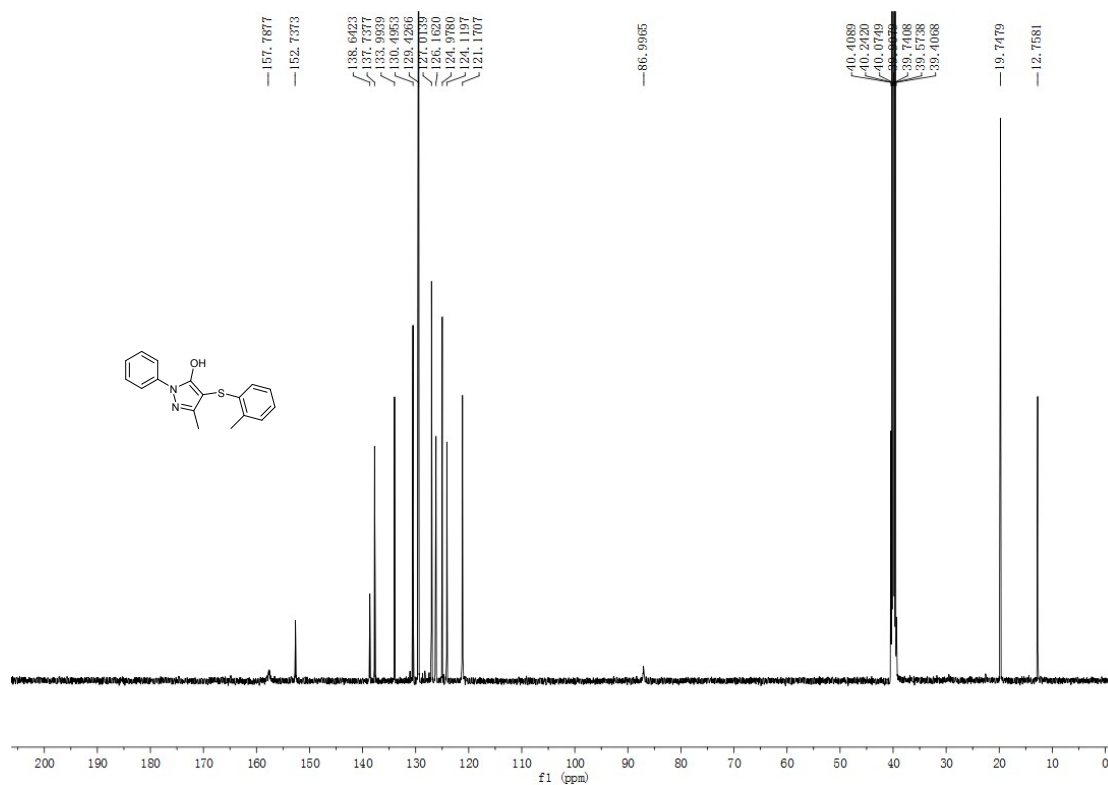

3af

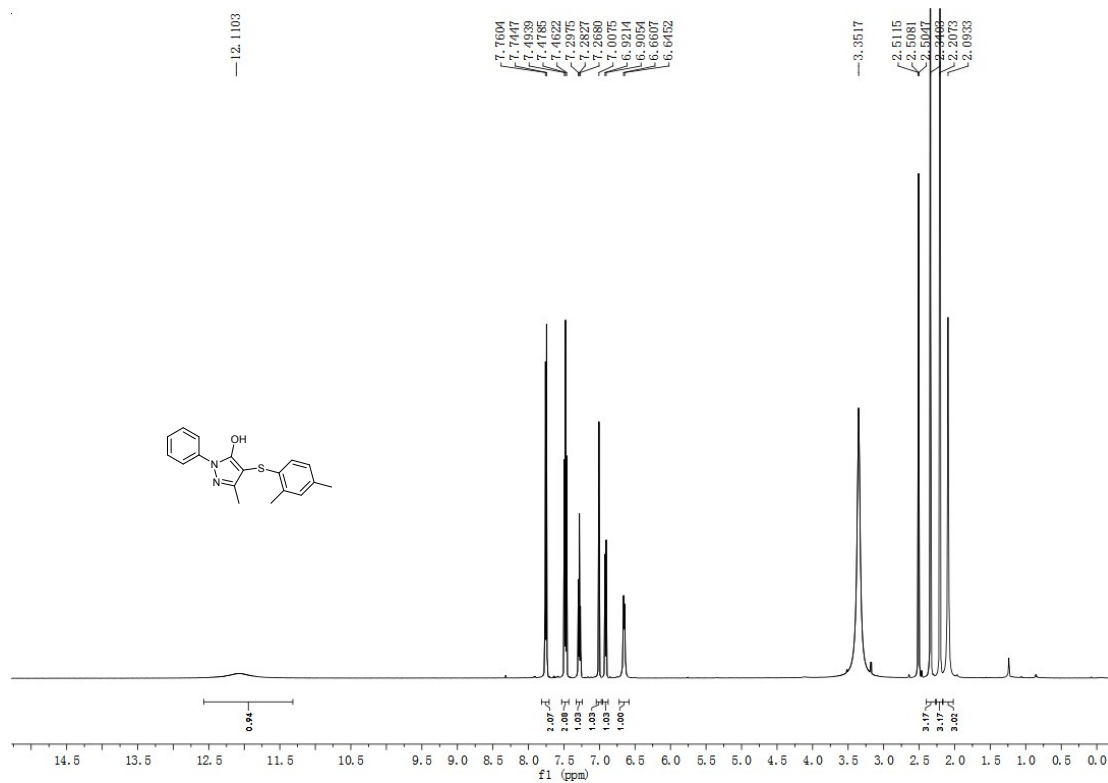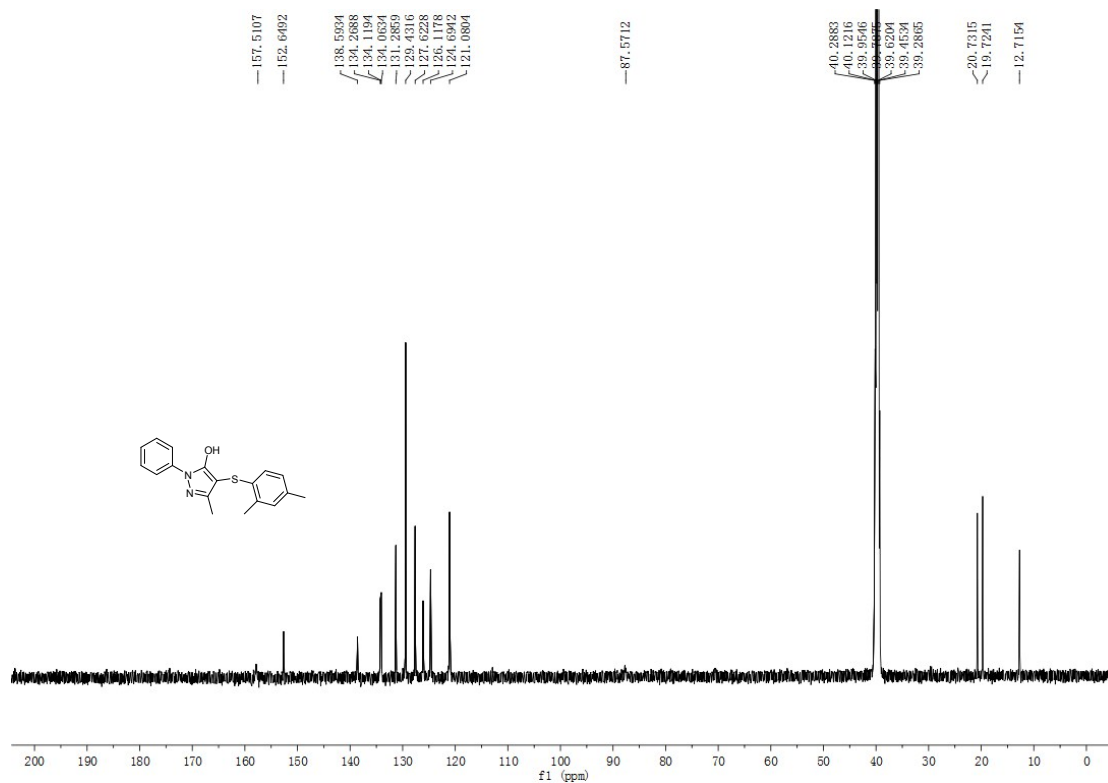

3ag

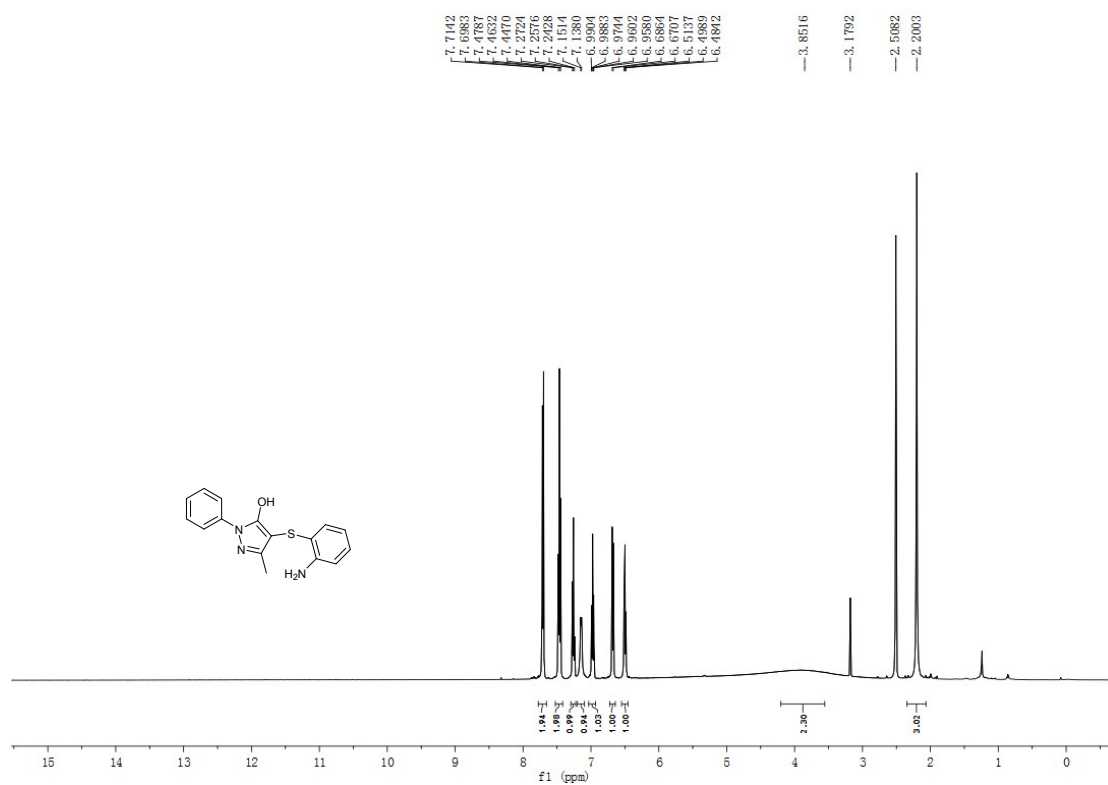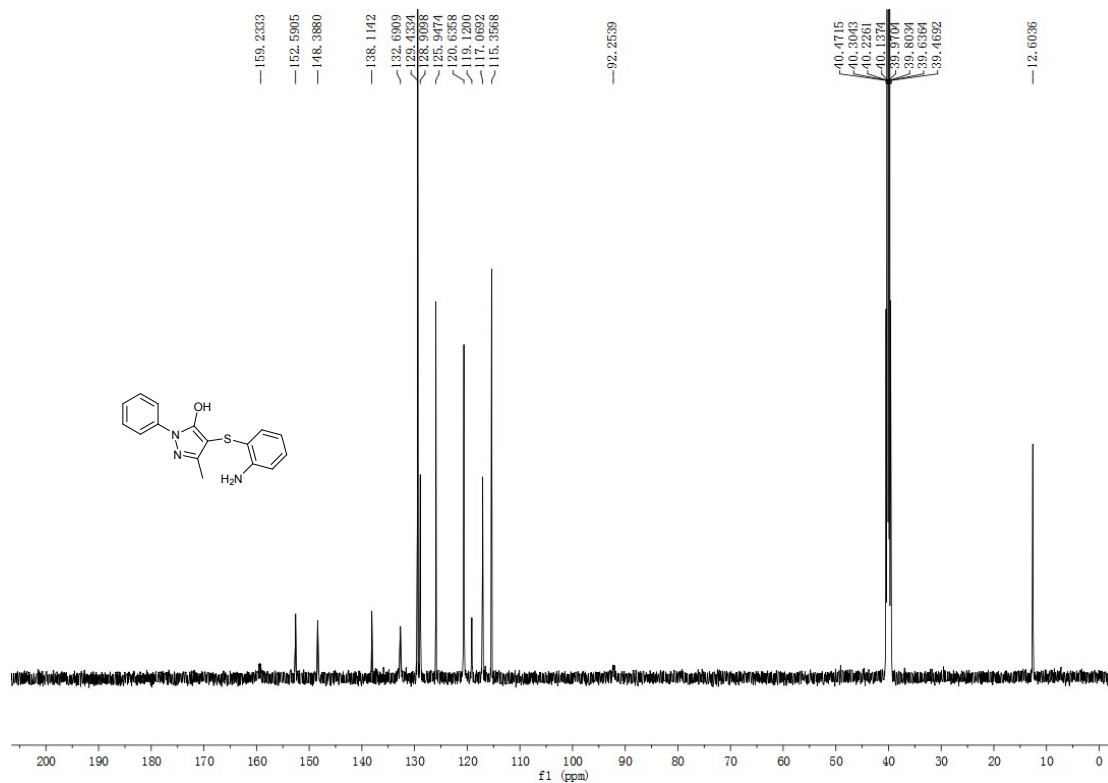

3ah

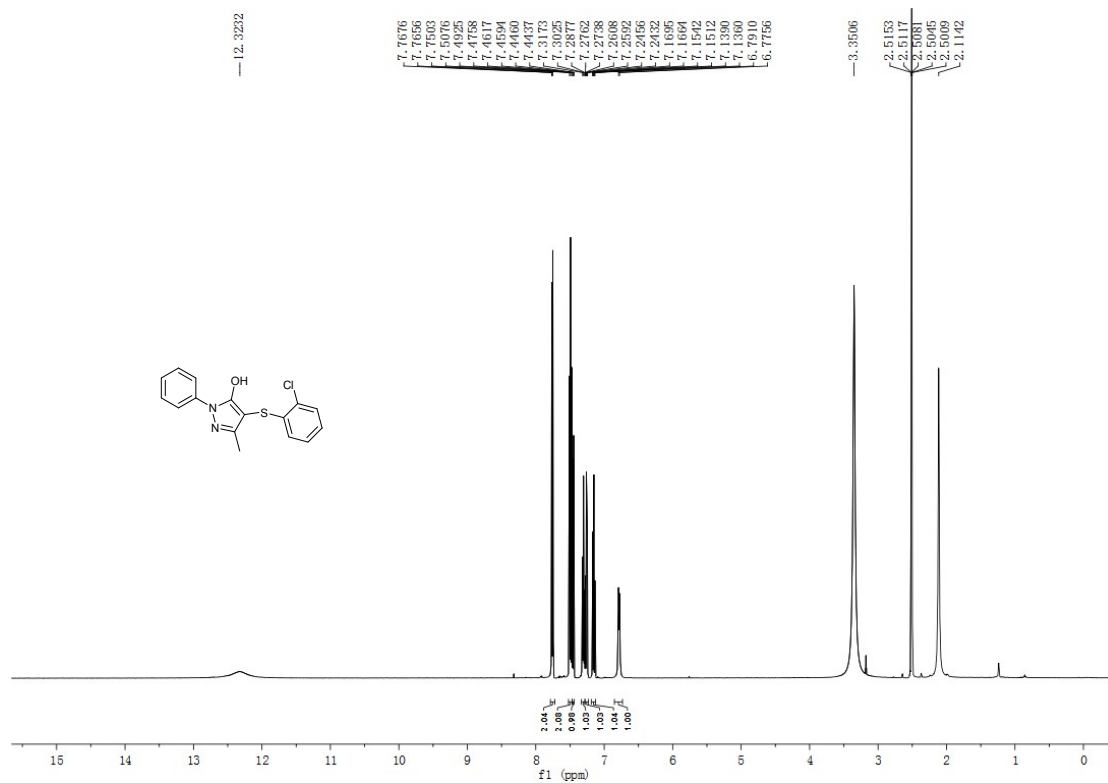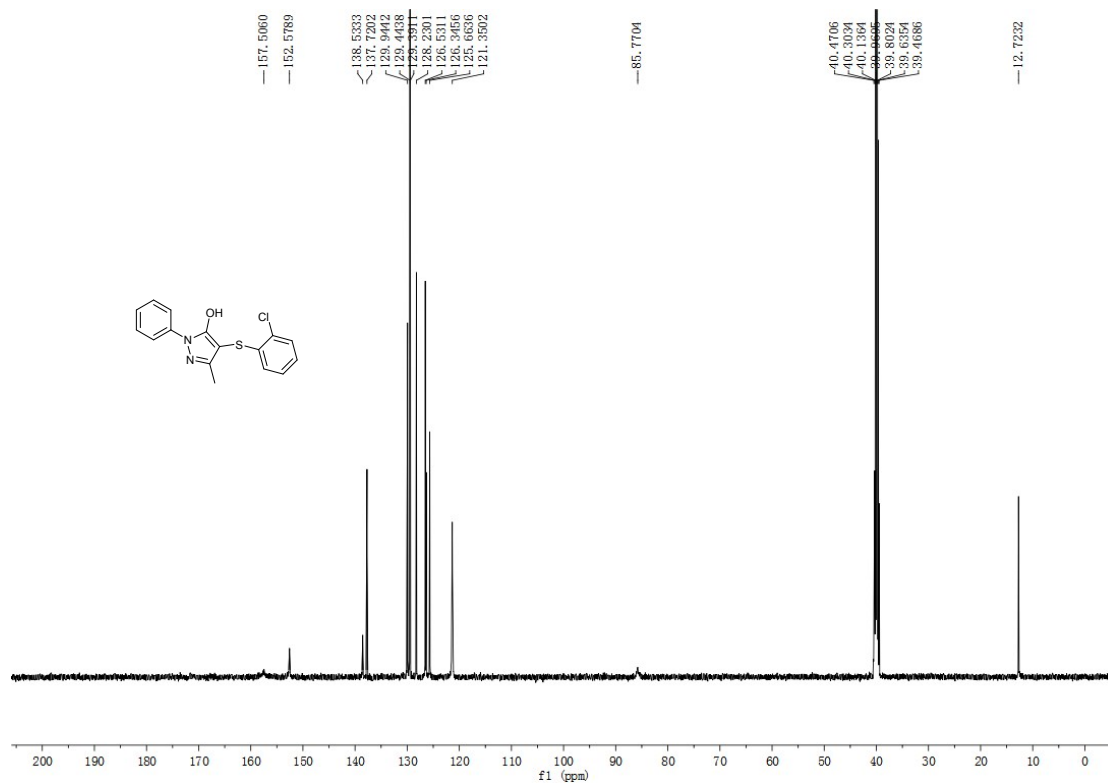

3ai

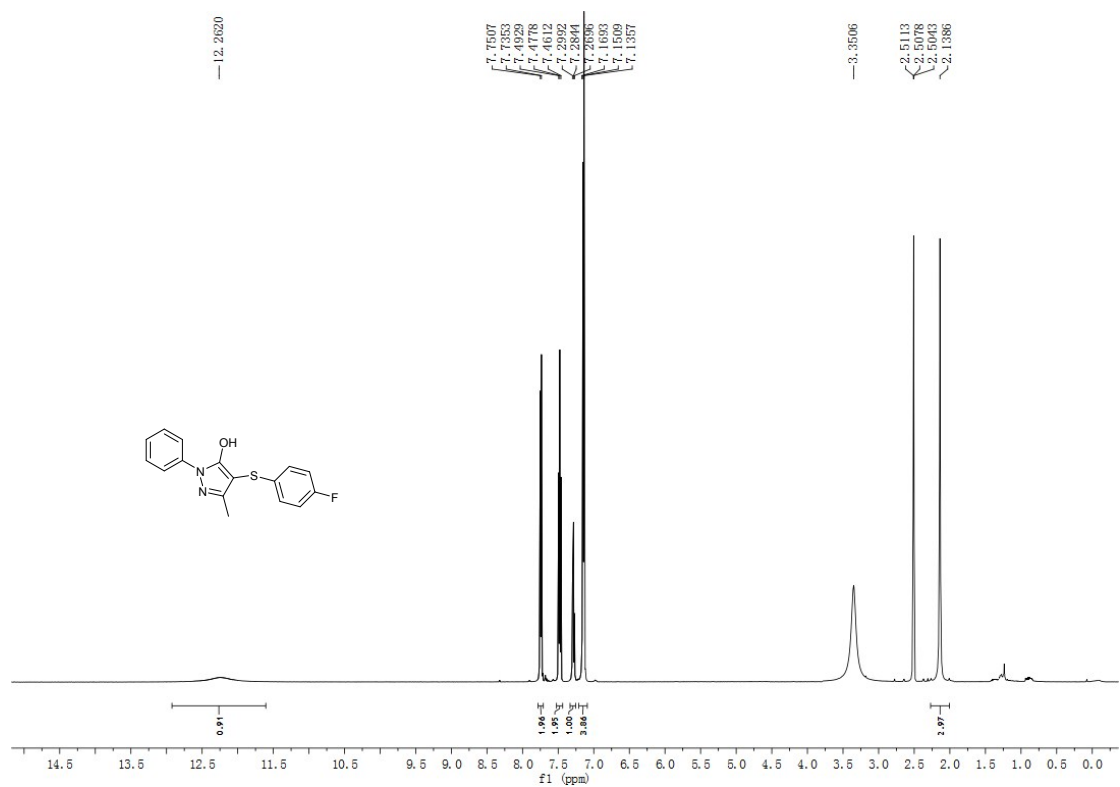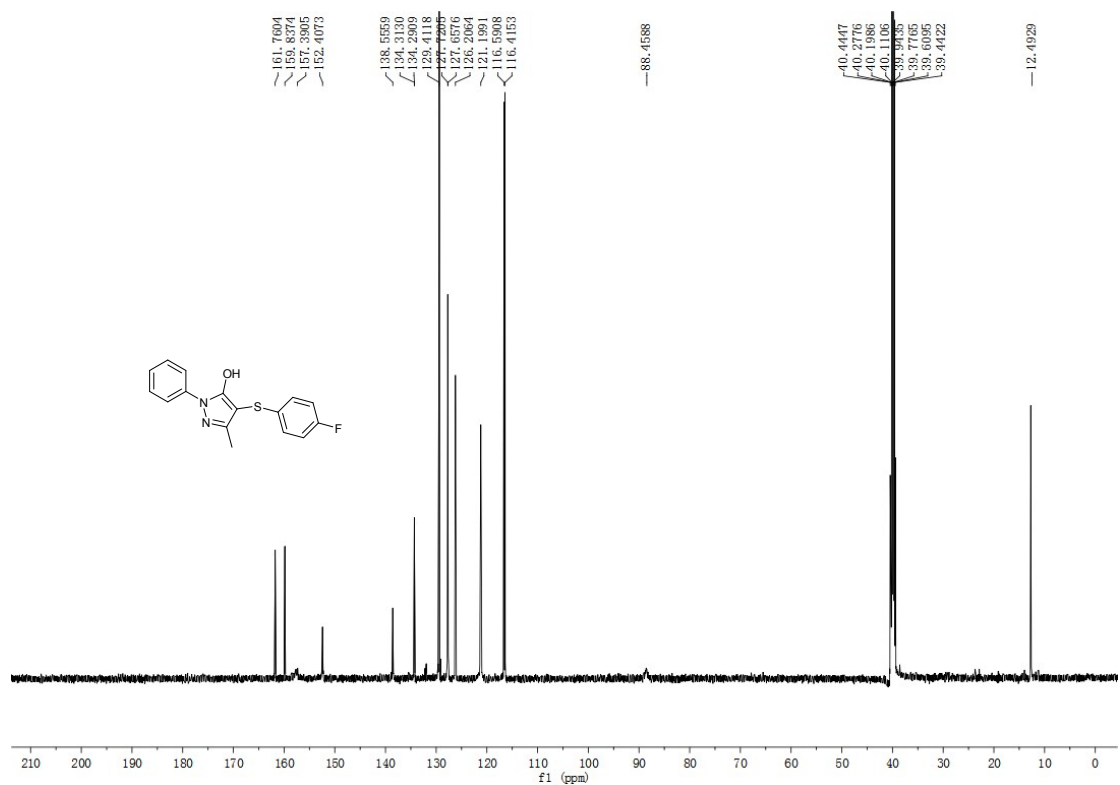

3aj

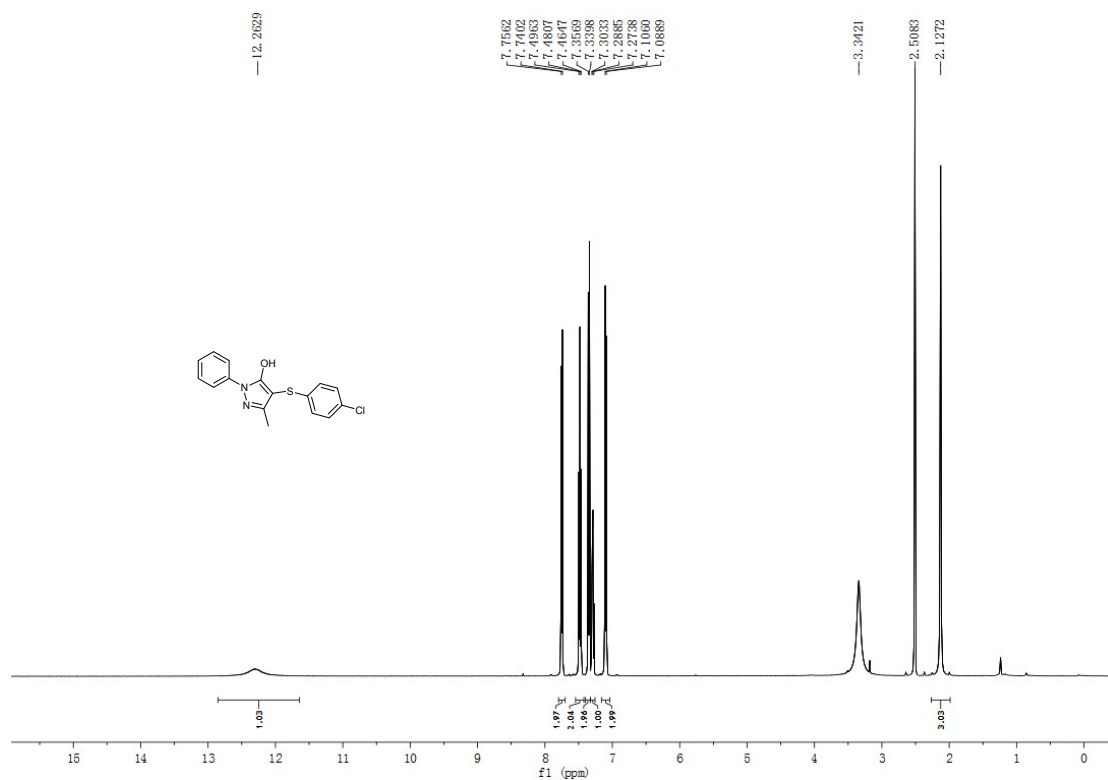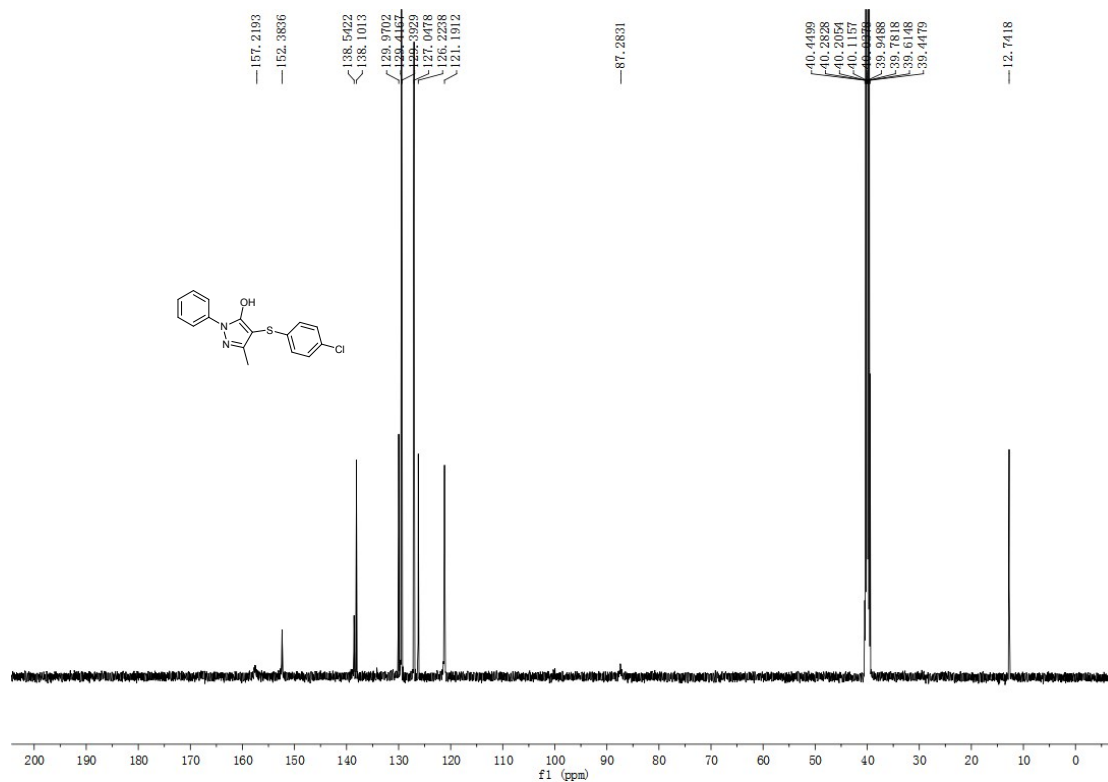

3ak

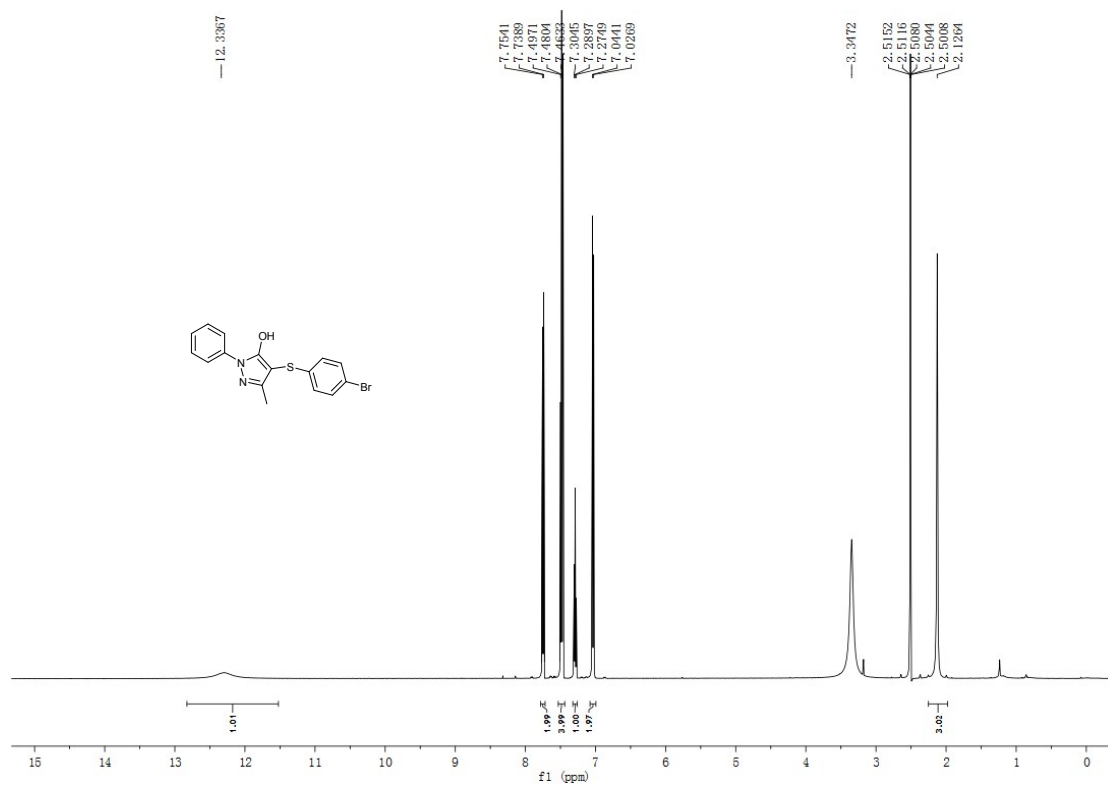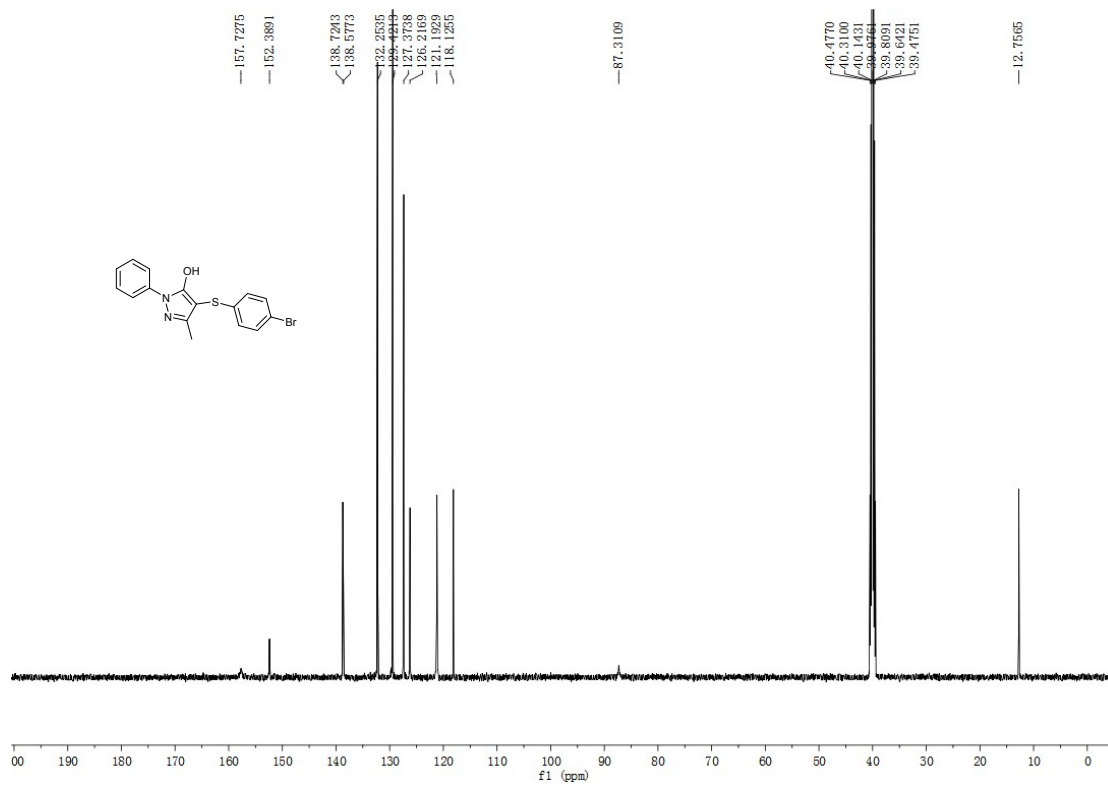

3aI

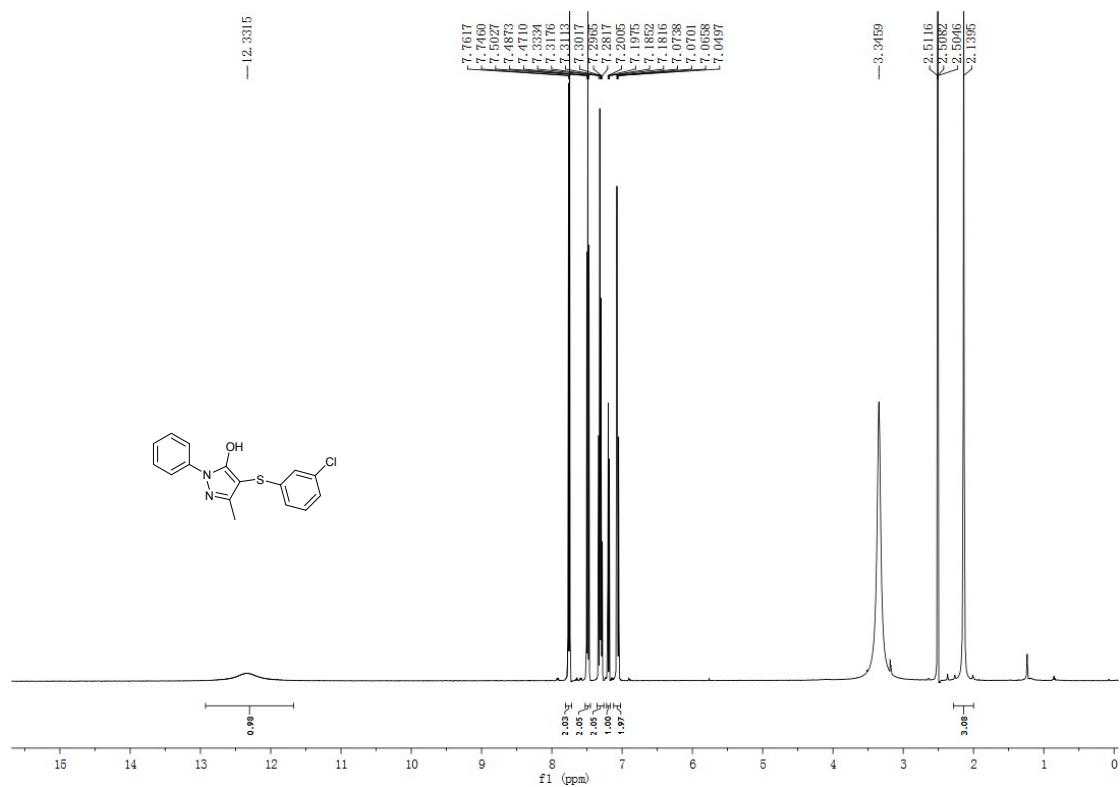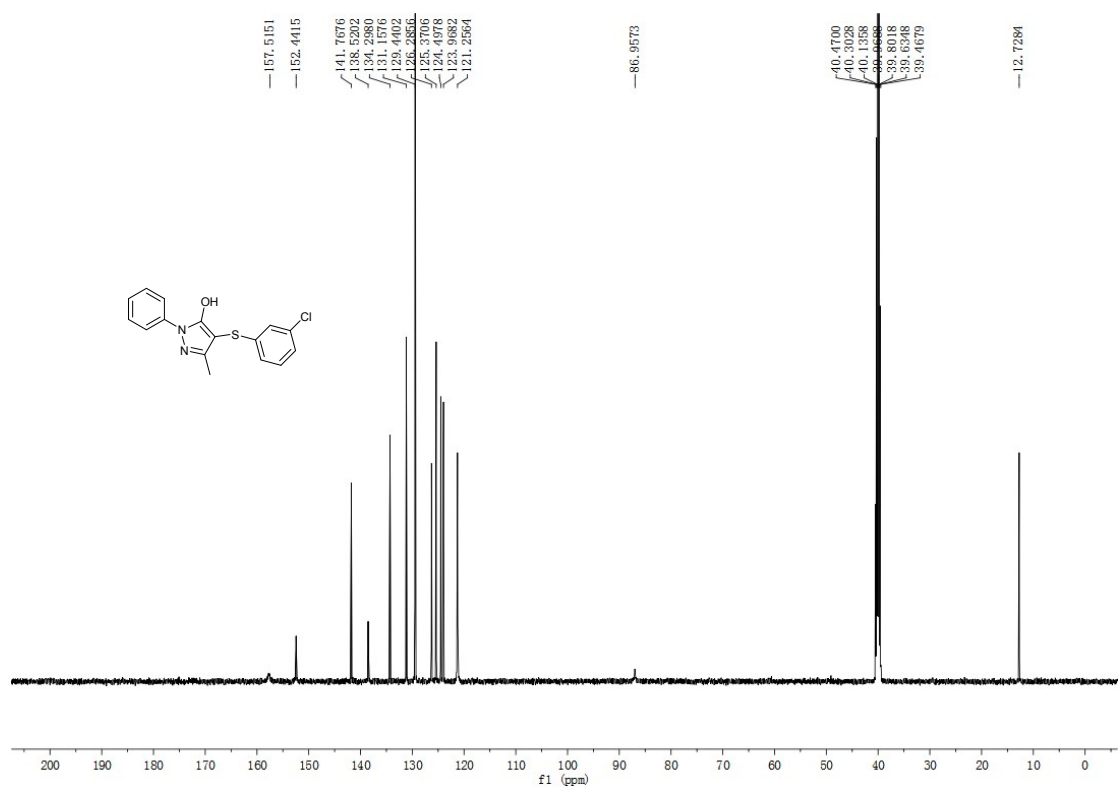



3am

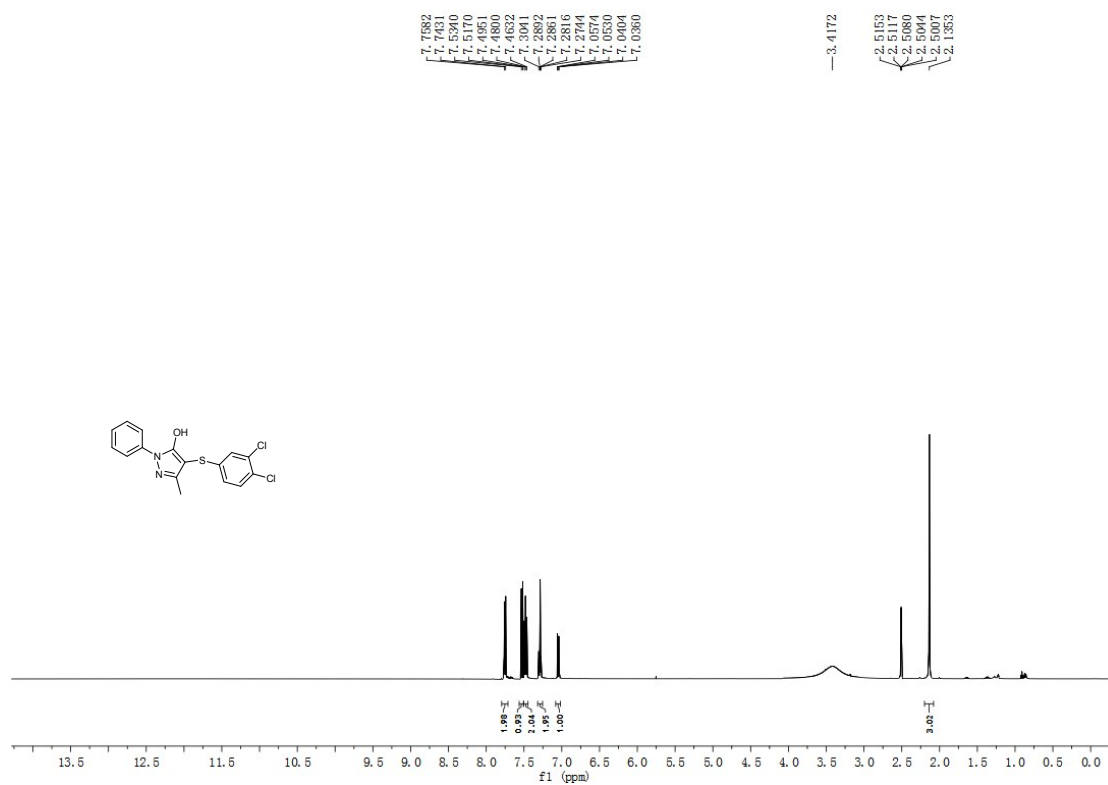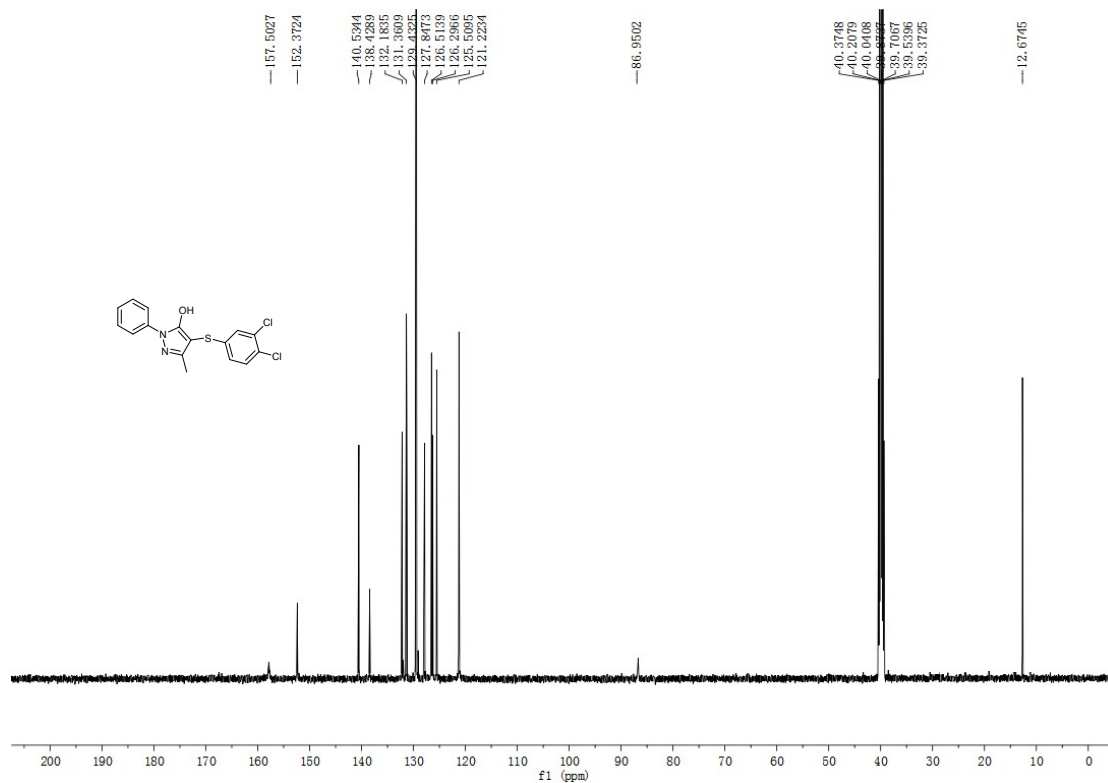

3an

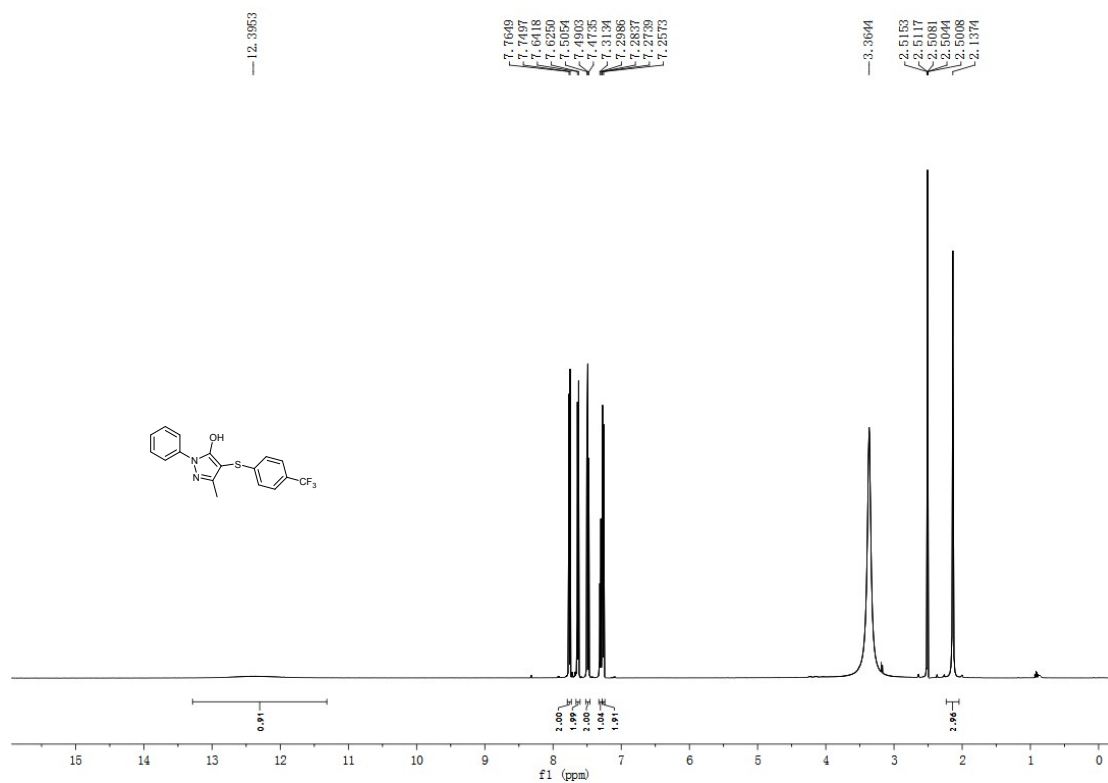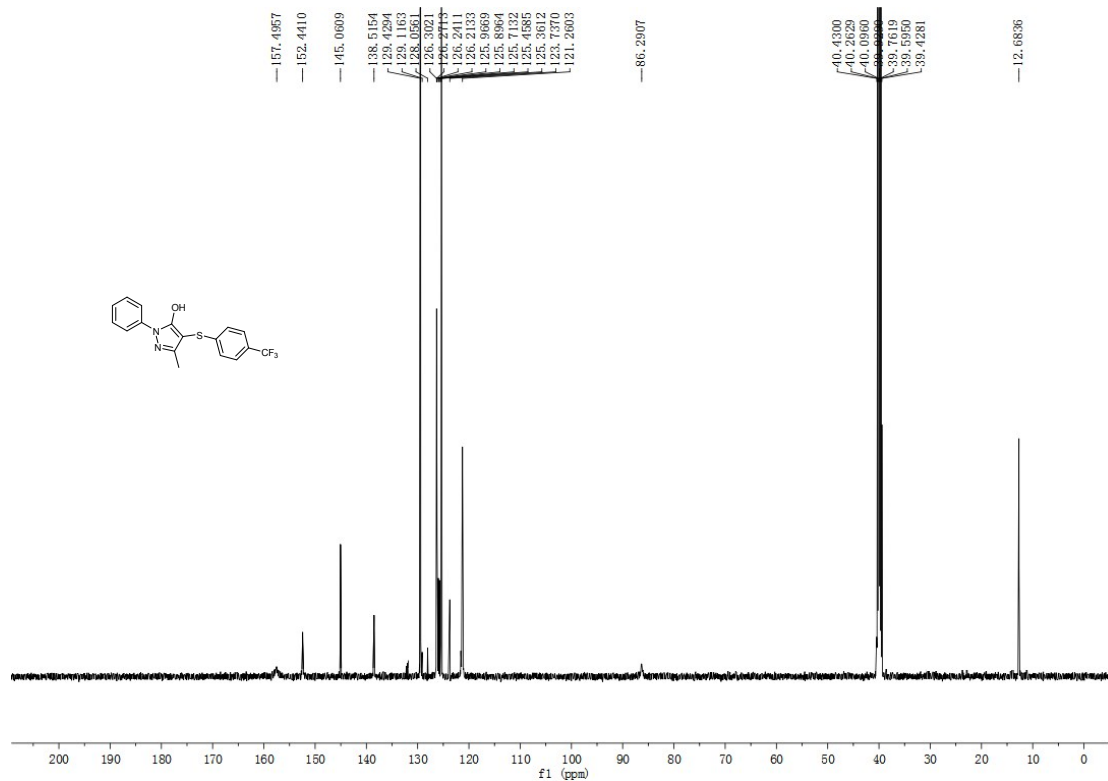

3ba

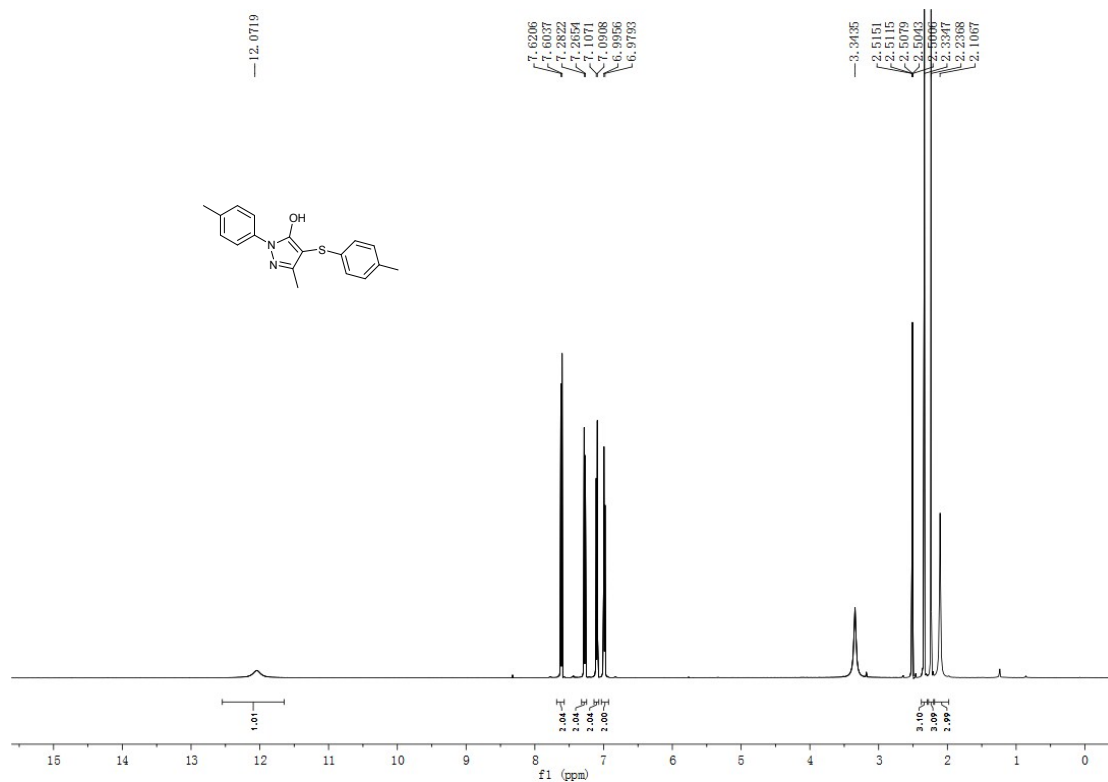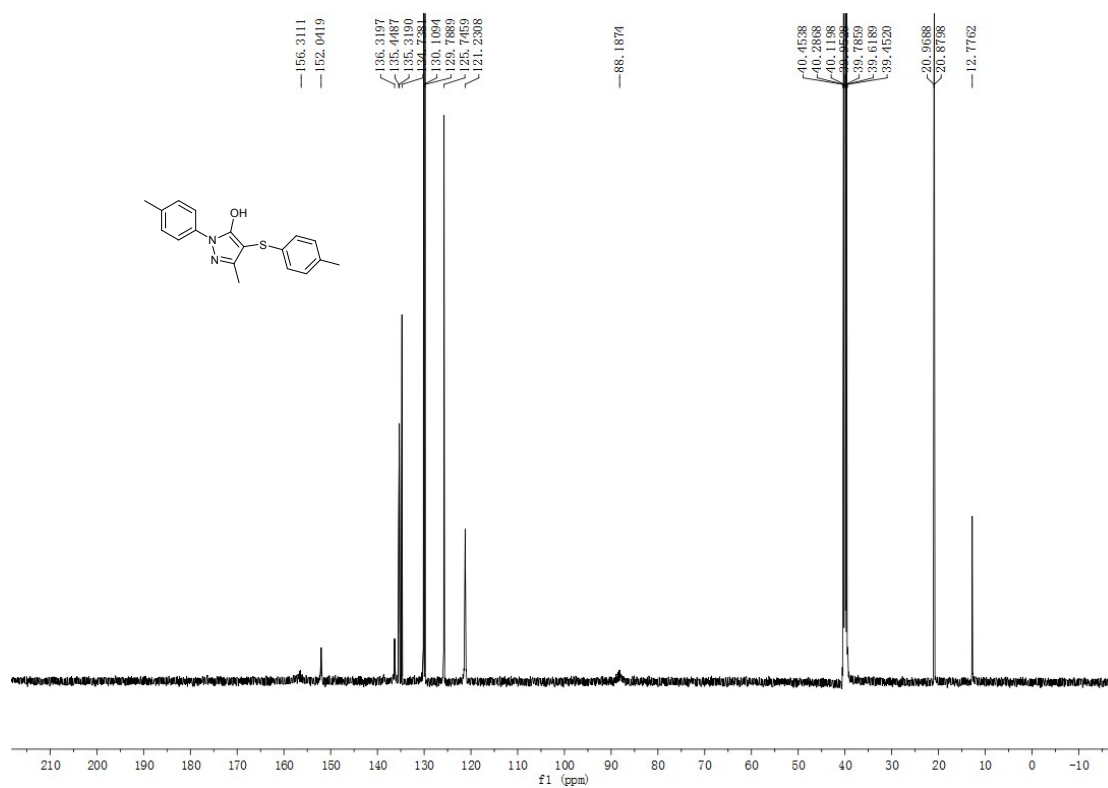

3ca

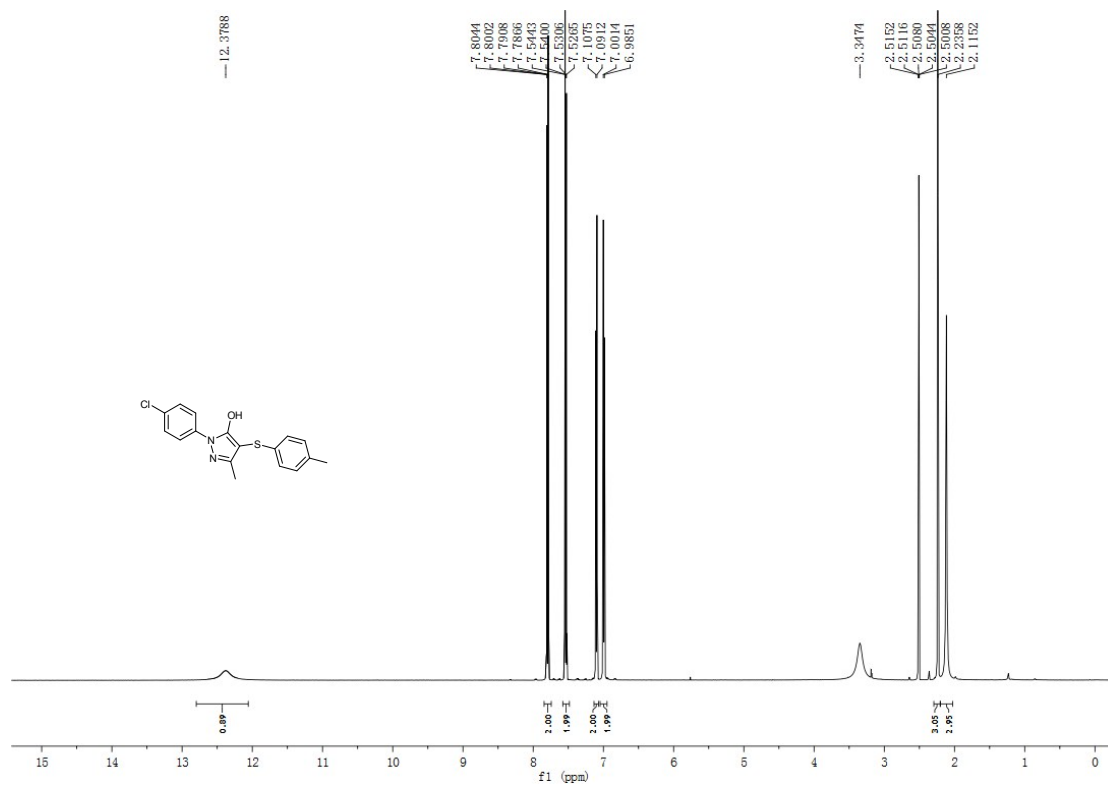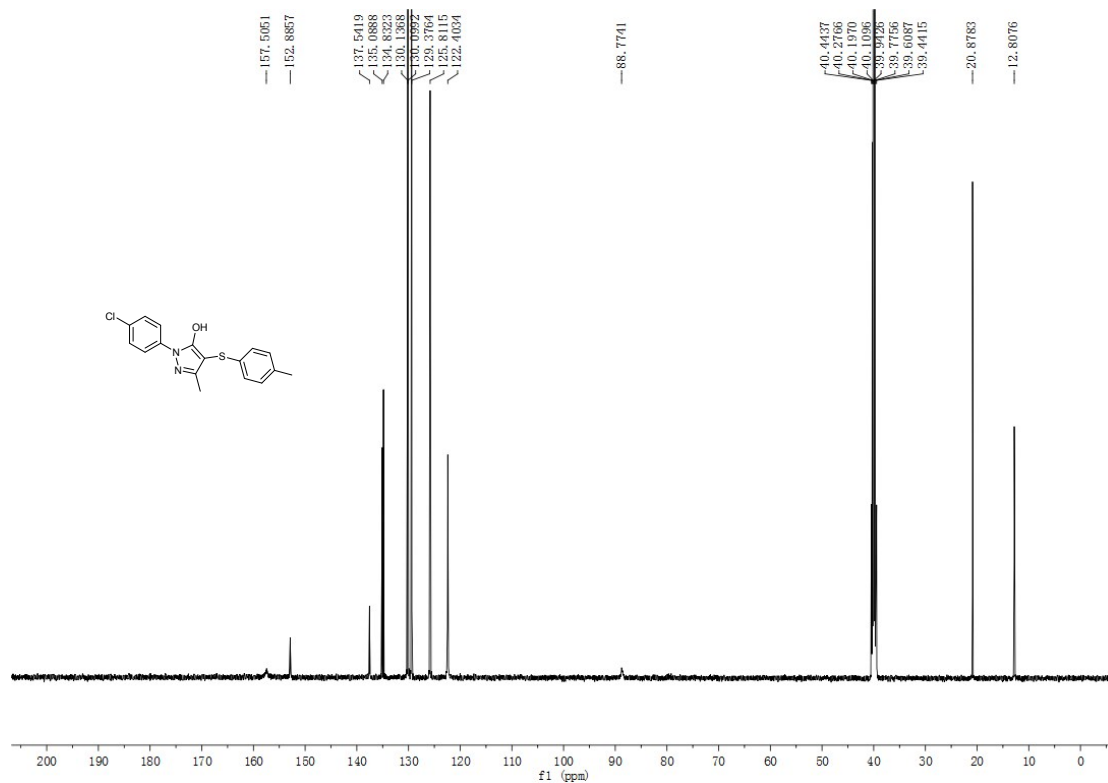

3da

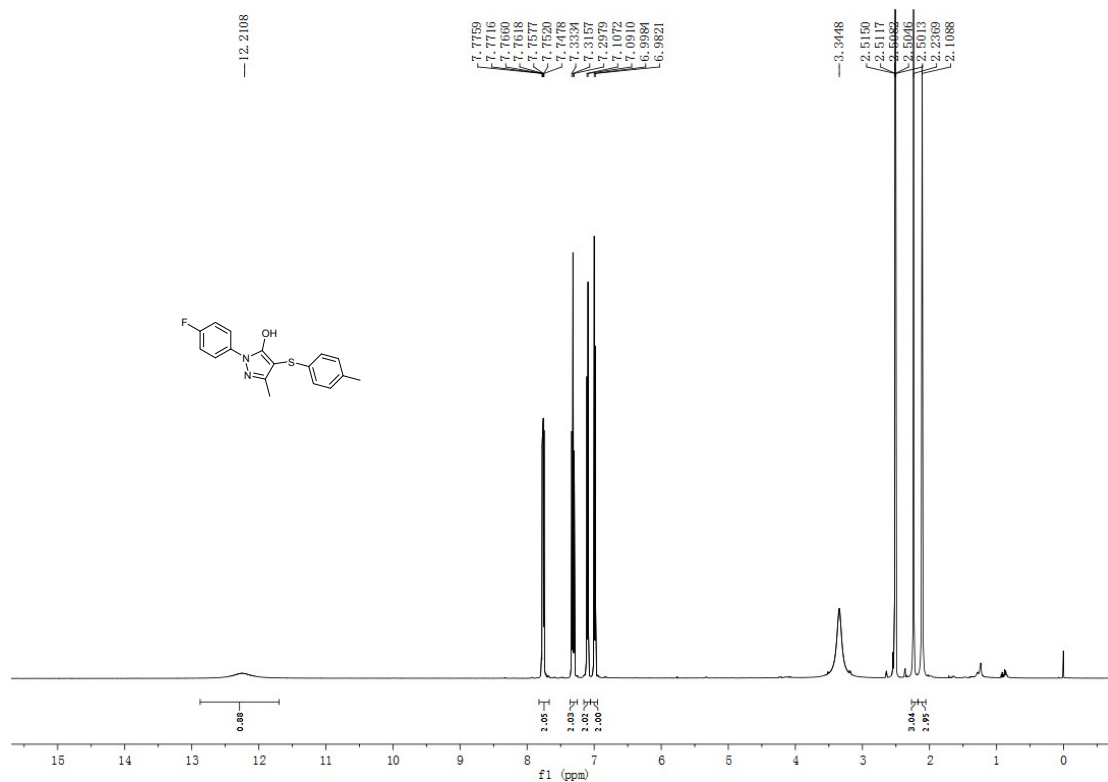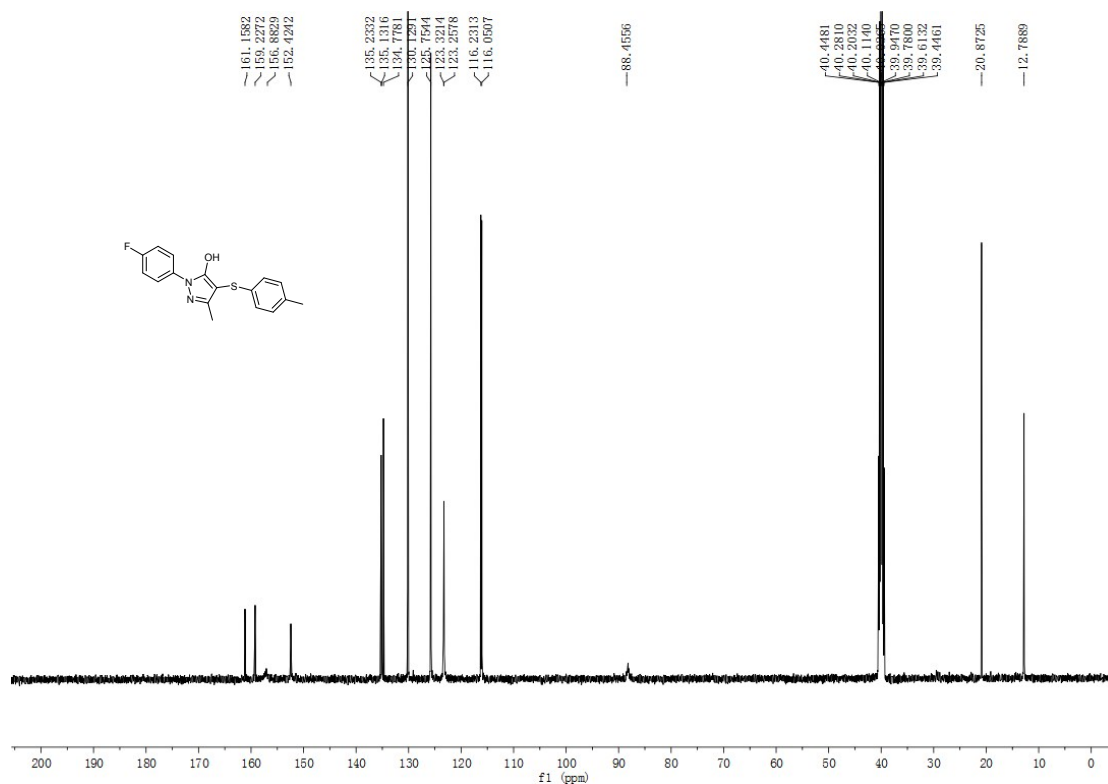

3ea

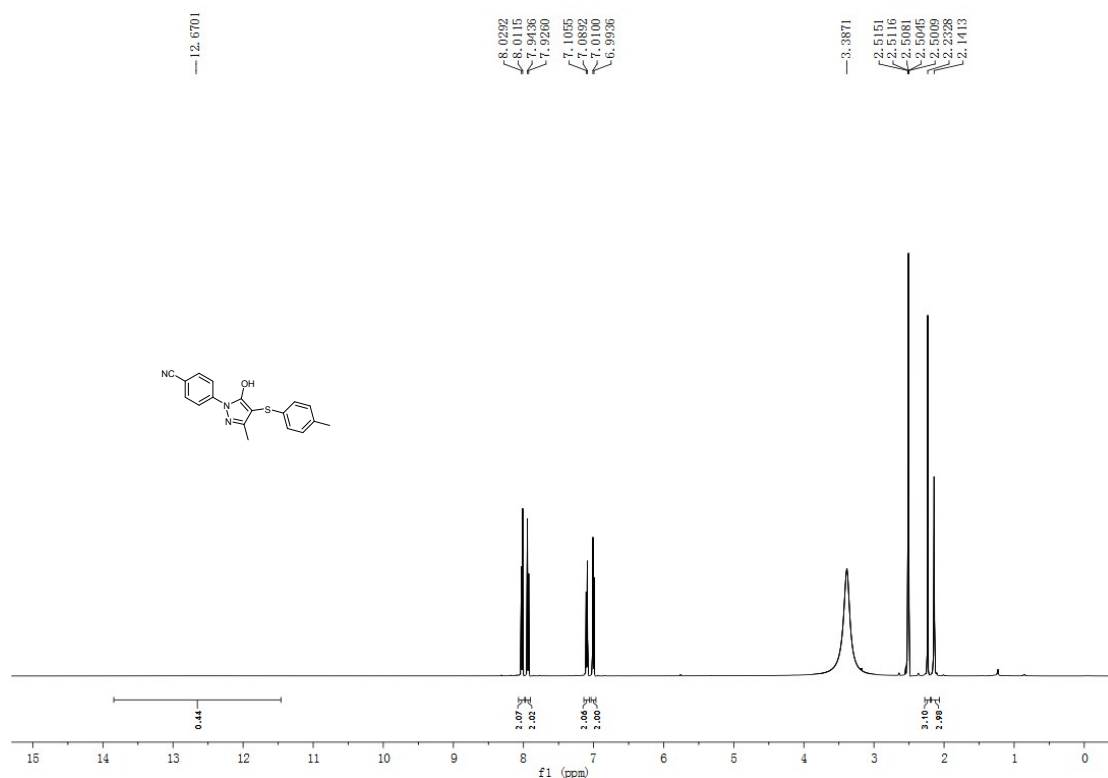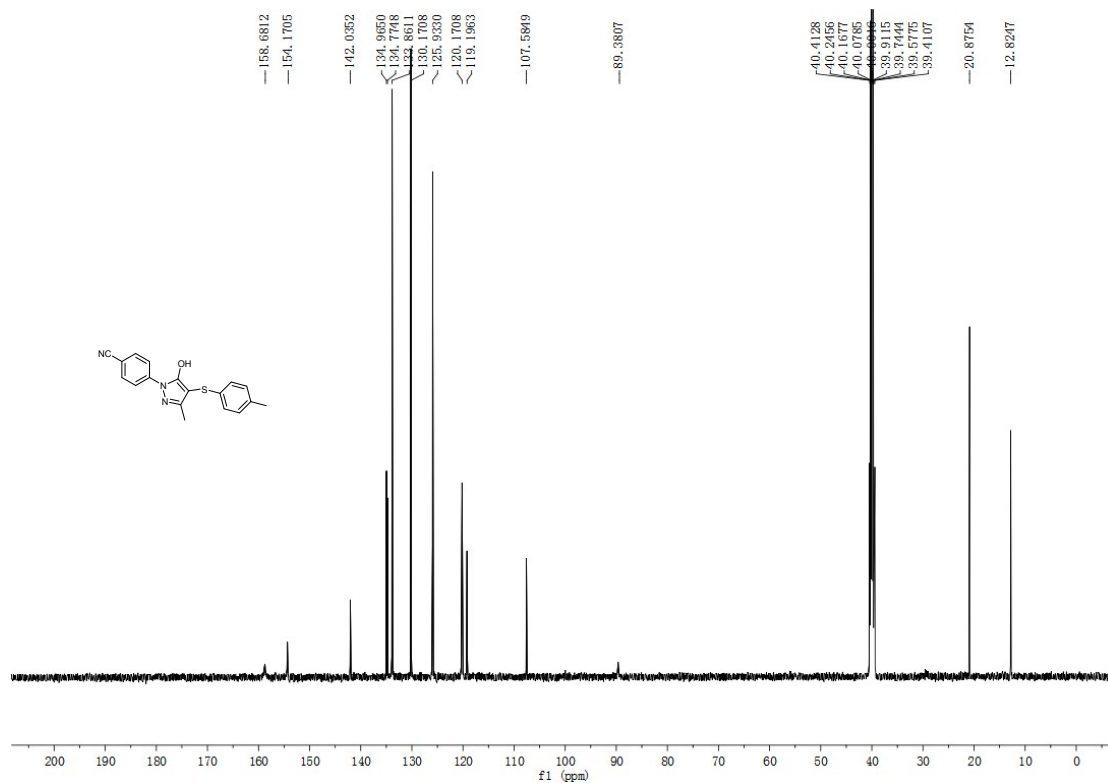

3fa

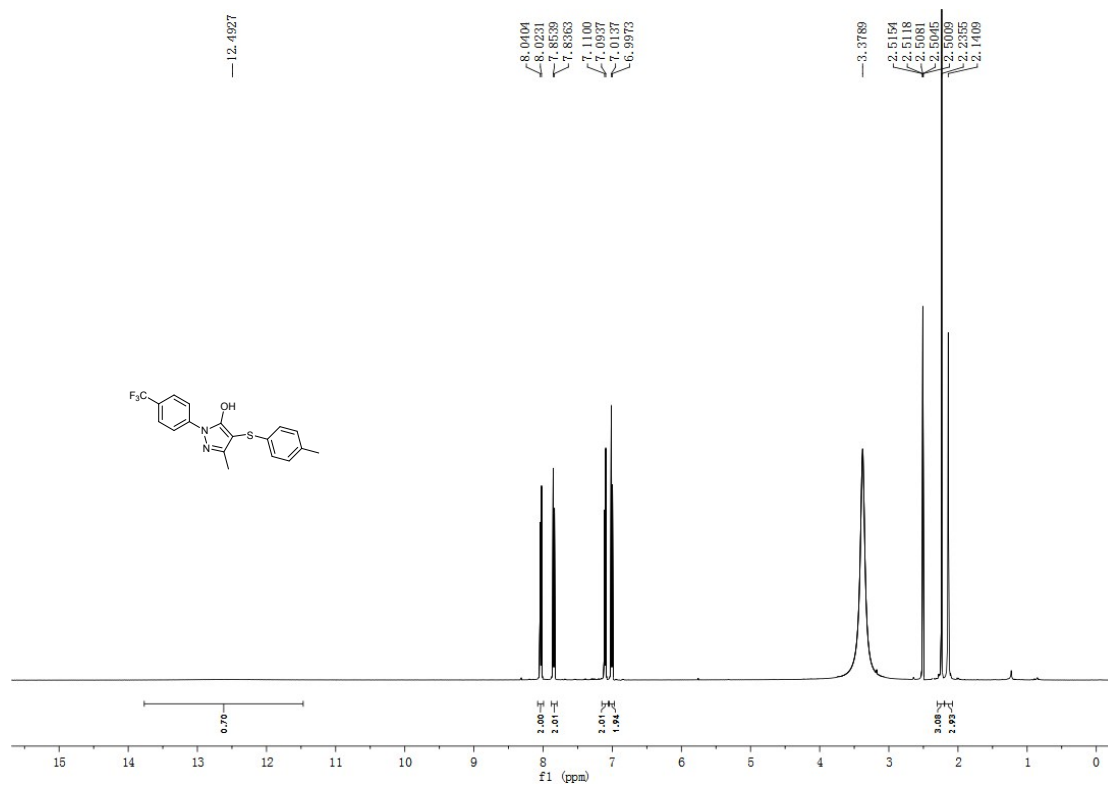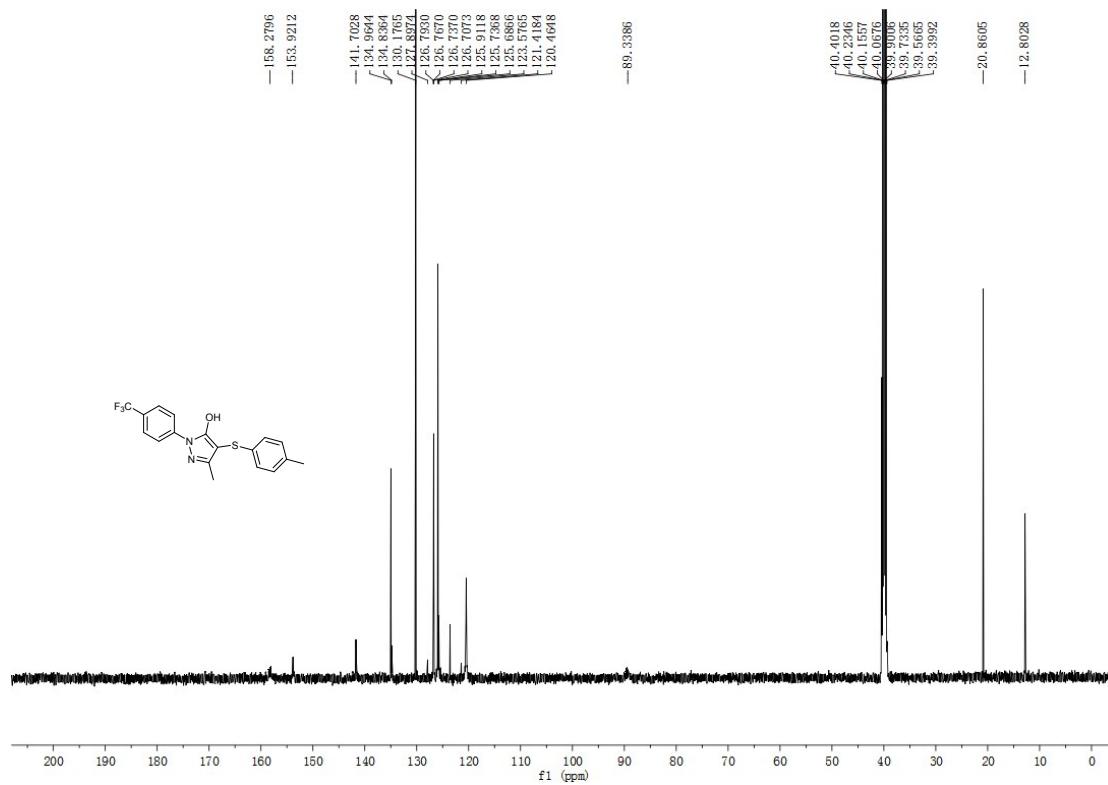

3ga

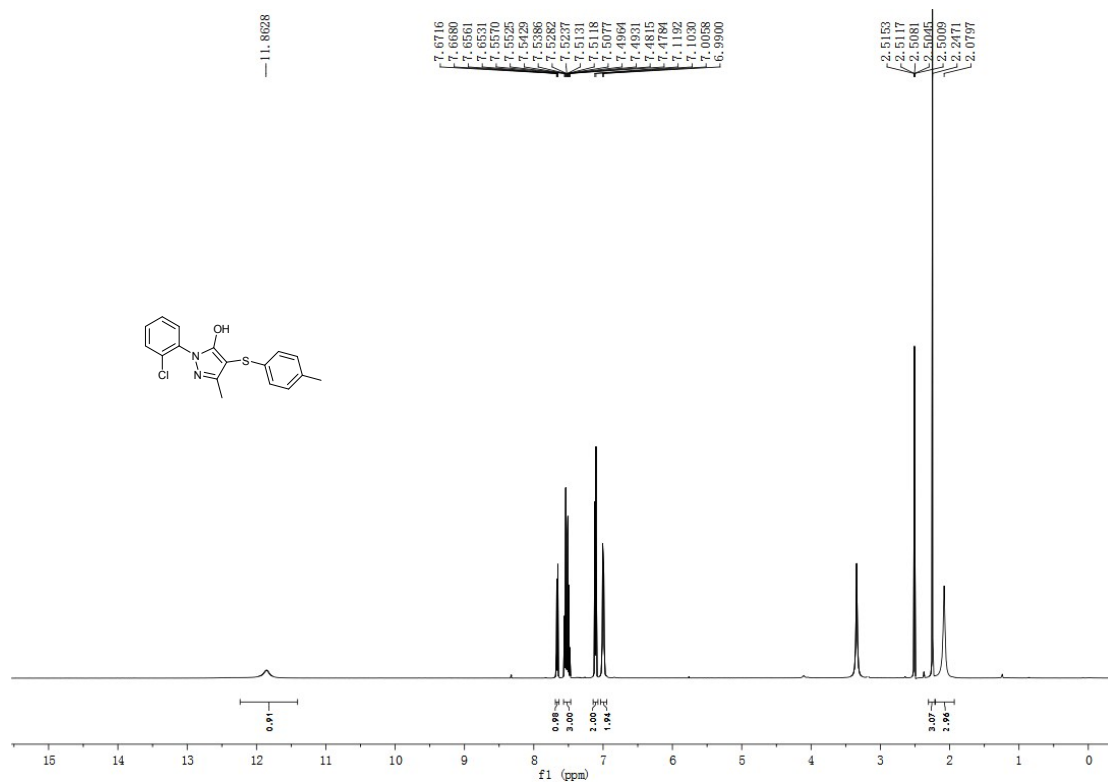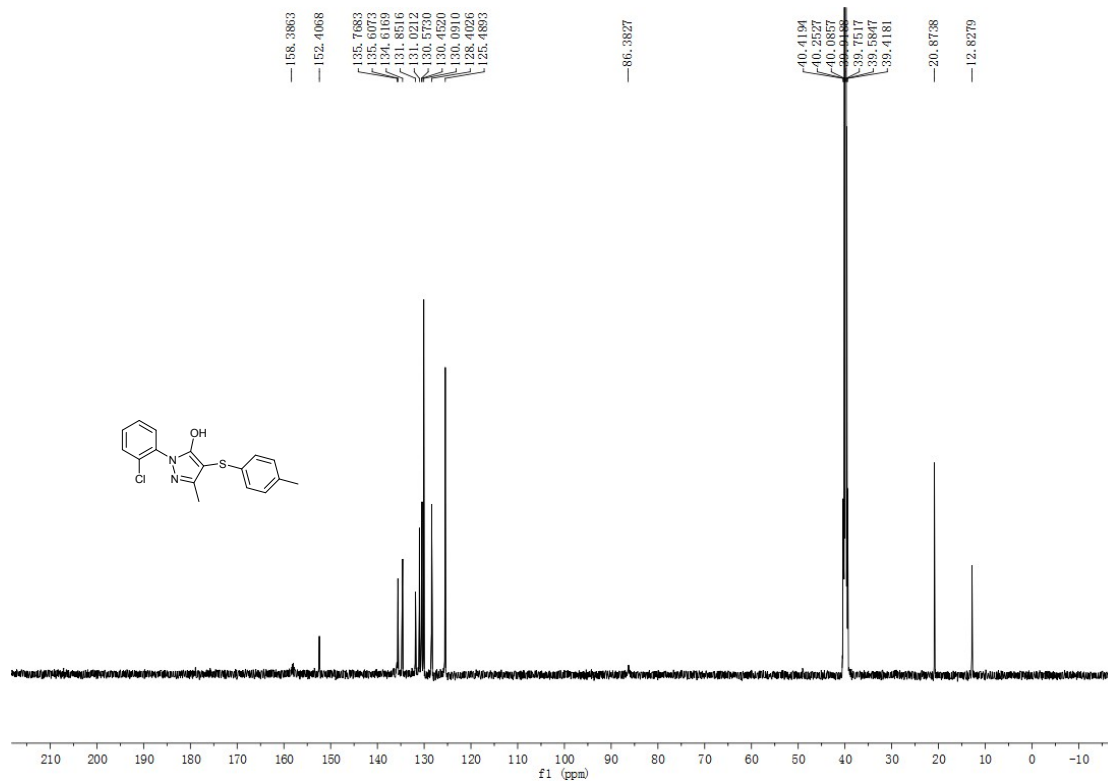



3ha

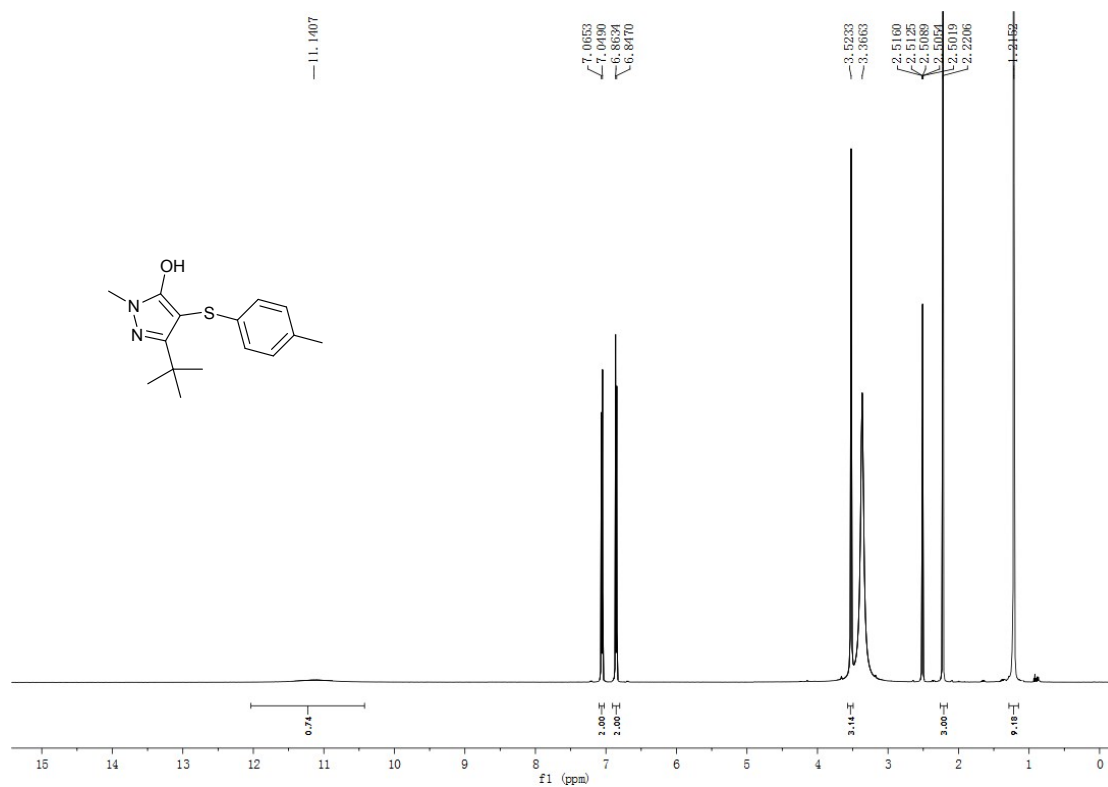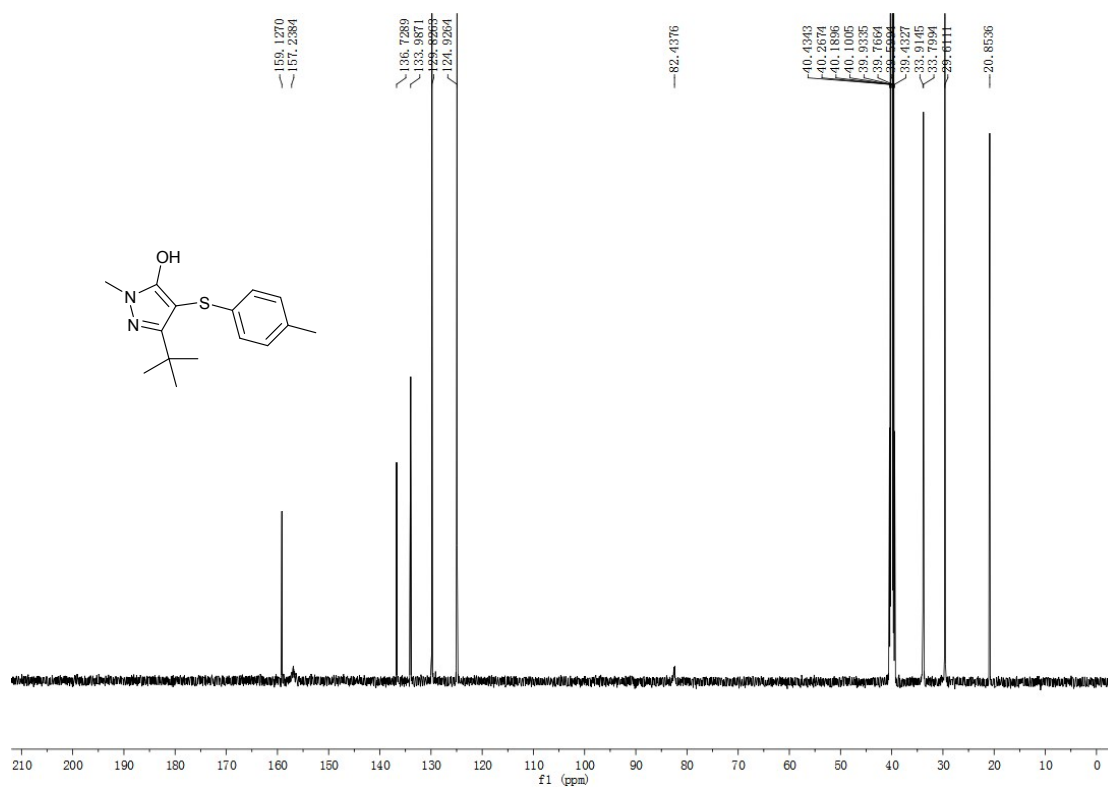

Supplement: c6ra09739a1.pdf [file c6ra09739a1.pdf]
